1 ***A subcortical circuit linking the cerebellum to the basal ganglia engaged in***  
2 ***vocal learning***

3  
4 Ludivine Pidoux<sup>1</sup>, Pascale Leblanc<sup>1</sup>, Arthur Leblois<sup>1</sup>

5 **1-** Center for Neurophysics, Physiology and Pathology (UMR CNRS 8119), Institute for  
6 Neuroscience and Cognition, Paris Descartes University, 45 rue des Saints Pères, 75006  
7 Paris, France

8  
9 ***Abstract:***

10 Speech is a complex sensorimotor skill, and vocal learning involves both the basal ganglia and  
11 the cerebellum. These subcortical structures interact indirectly through their respective loops with  
12 thalamo-cortical and brainstem networks, and directly via subcortical pathways, but the role of their  
13 interaction during sensorimotor learning remains undetermined. While songbirds and their song-  
14 dedicated basal ganglia-thalamo-cortical circuitry offer a unique opportunity to study subcortical  
15 circuits involved in vocal learning, the cerebellar contribution to avian song learning remains  
16 unknown. We demonstrate that the cerebellum provides a strong input to the song-related basal  
17 ganglia nucleus in zebra finches. Cerebellar signals are transmitted to the basal ganglia via a  
18 disynaptic connection through the thalamus and then conveyed to their cortical target and to the  
19 premotor nucleus controlling song production. Finally, cerebellar lesions impair juvenile song  
20 learning, opening new opportunities to investigate how subcortical interactions between the  
21 cerebellum and basal ganglia contribute to sensorimotor learning.

22  
23 ***Introduction:***

24 Speech is a highly complex motor skill which requires precise and fast coordination between  
25 vocal, facial and respiratory muscles. Human infants learn to reproduce adult vocalizations and to  
26 progressively master speech motor coordination within their first few years of life through an imitation  
27 process that builds up on motor sequence learning and strongly relies on auditory feedback (Kuhl and  
28 Meltzoff, 1996). This process, called vocal learning, is widely believed to rely on similar mechanisms  
29 as sensorimotor learning in general (Doupe and Kuhl, 1999; Kuhl and Meltzoff, 1996). The neural  
30 mechanisms underlying this process remain, however, poorly understood. Brain circuits known to be

31 essential for sensorimotor adaptation and learning, namely the basal ganglia-thalamo-cortical loop  
32 (Krakauer and Mazzoni, 2011; Pekny et al., 2015) and the cerebello-thalamo-cortical loop (Brooks et  
33 al., 2015; Izawa et al., 2012), are both crucial for vocal learning in humans (Vargha-Khadem et al.,  
34 2005; Ziegler and Ackermann, 2017). The anatomical structure of these circuits and their function in  
35 sensorimotor learning are well conserved over vertebrate evolution (Grillner and Robertson, 2016;  
36 Redgrave et al., 1999; Sultan and Glickstein, 2007). In particular, avian song learning has been used as  
37 a paradigm to study the neural mechanisms of vocal learning, as it shares striking similarities with  
38 human speech learning (reviewed in Doupe and Kuhl, 1999).

39         The basal ganglia-thalamo-cortical network is involved in sensorimotor learning in several  
40 species, from lamprey to primates (Hikosaka et al., 2002; Stephenson-Jones et al., 2013; Wickens et  
41 al., 2007). The basal ganglia are thought to rely on reward prediction error signals conveyed by  
42 dopaminergic neurons (Gadagkar et al., 2016; Schultz et al., 1997; Wickens et al., 2003) to drive  
43 reinforcement learning strategies (Doya, 2000; Sutton and Barto, 1981). In songbirds, a specialized  
44 circuit homologous to the motor loop of the mammalian basal ganglia (Doupe et al., 2005) is critical  
45 for song learning in juveniles and plasticity in adults (Brainard and Doupe, 2002). This circuit is  
46 thought to correct vocal errors through reinforcement learning driven by an internal song evaluation  
47 signal conveyed by dopaminergic neurons (Fee and Goldberg, 2011; Gadagkar et al., 2016; Hoffmann  
48 et al., 2016).

49         The cerebello-thalamo-cortical circuit also participates in sensorimotor learning in vertebrates,  
50 from fish to primates (Brooks et al., 2015; Gómez et al., 2010; Lewis and Maler, 2004). It is believed  
51 to implement error-based supervised learning (Albus, 1971; Ito, 1984; Knudsen, 1994; Marr, 1969;  
52 Raymond et al., 1996) based on an error prediction denoting a mismatch between sensory prediction  
53 and actual sensory feedback (Doya, 2000; Dreher and Grafman, 2002). The cerebellum also drives on-  
54 line correction during movements building on the same sensory error prediction (Tseng et al., 2007;  
55 Booth et al., 2007). The existence of a pathway from the cerebellum to the song-related basal ganglia  
56 has been suggested by previous anatomical studies in songbirds (Person et al., 2008; Vates et al.,  
57 1997), but whether cerebellar circuits are involved in avian song learning and production remains  
58 unknown.

59         Beyond the indirect interaction via their respective loop with thalamo-cortical and brainstem  
60 networks, the basal ganglia and the cerebellum interact via a subcortical disynaptic pathway through  
61 the dentate nucleus, the motor part of the thalamus, and the striatum (Bostan et al., 2010; Chen et al.,  
62 2014; Hoshi et al., 2005). The cerebellum and the basal ganglia therefore do not simply act in parallel  
63 to shape cortical and brainstem activity during learning. In this paper we make the hypothesis that  
64 cerebellar signals may reach the basal ganglia to drive error correction and reinforcement learning  
65 through the same output pathway. We test this hypothesis in zebra finches. We show that (i) cerebellar

66 inputs are conveyed via the thalamus to the basal ganglia in songbirds, (ii) they drive activity in the  
67 cortical target of the basal ganglia, and (iii) the cerebellar signals participate in juvenile song learning.

## 68 **Results:**

69 To test the hypothesis that cerebellar signals are sent to the song-related basal ganglia circuits  
70 and that the cerebellum participates in song learning, we performed the following experiments. We  
71 first reproduced the anatomical finding by Person et al. (2008) that the DCN send a projection to a  
72 thalamic region, which in turn projects to the song-related BG nucleus Area X. We then recorded  
73 responses to DCN electrical stimulation in Area X and its cortical targets and determined the nature of  
74 the neural pathway linking with pharmacological manipulations. Finally, we compared song learning  
75 ability in finches following DCN or sham lesions.

76

77 - *Anatomical connections exist from the DCN to the basal ganglia via the thalamus.*

78 We performed anatomical tracing experiments to confirm the previously reported (Person et  
79 al., 2008) indirect connection from the deep cerebellar nuclei (DCN) to the song-related basal ganglia  
80 nucleus Area X, via the dorsal thalamic zone (DTZ). The retrograde tracer Cholera-toxin B (CtB),  
81 captured by synapses (see Methods), was injected in Area X while a bidirectional tracer (fluorescently  
82 tagged dextran) was injected in the lateral DCN. Labeling of the Purkinje cells in the cerebellar cortex  
83 confirmed the proper location of the injection sites in the DCN (Fig. 1A, right panel). As shown in  
84 examples (Fig. 1B-C-D), we found fibers labeled with the DCN-injected tracer in the dorsal thalamic  
85 zone (DTZ), posterior to the thalamic nucleus involved in song learning and production (dorsolateral  
86 nucleus of the anterior thalamus, DLM), which indicates axonal projections from DCN neurons to this  
87 region. Within the same area, cell somata of thalamic neurons in DTZ were labeled with the retrograde  
88 tracer injected in Area X (Fig. 1B-C). The close association of the two types of tracers with  
89 anterogradely-labeled fibers making putative contacts on retrogradely-labeled cell bodies (Fig. 1D)  
90 suggests that neurons in the lateral DCN project to DTZ thalamic neurons, which in turn project to the  
91 song-related basal ganglia nucleus Area X.

92 We also injected bidirectional tracers (Dextran-associated fluorochrome) in DTZ (Fig. 1E). In  
93 the cerebellum, retrograde transport of the tracer was confined to large cell bodies within the DCN  
94 (Fig. 1F). Labeled cell bodies were located for the most part in the lateral DCN. We did not find  
95 dorso-ventral distinction in the labelling in the lateral DCN, suggesting that the projection from the  
96 lateral DCN to DTZ is not topographically organized (Fig. 1F). Moreover, some neurons in the  
97 interpositus nucleus were also labeled (results not shown). This suggests that even if the projection  
98 from the cerebellum to DTZ largely comes from the lateral DCN, the interpositus nuclei may also be  
99 partially involved in this cerebello-thalamic projection. Regarding the anterograde transport of tracers

100 injected in DTZ (Fig. 1E), we found many labeled axonal fibers in Area X, confirming the direct  
101 projection from DTZ to Area X (Fig.1G).

102 Thus, as already suggested in a previous study (Person et al., 2008) we found anatomical  
103 evidence for a disynaptic connection between the cerebellum and the song-related basal ganglia Area  
104 X: the lateral DCN sends projections to DTZ which in turn projects to Area X.

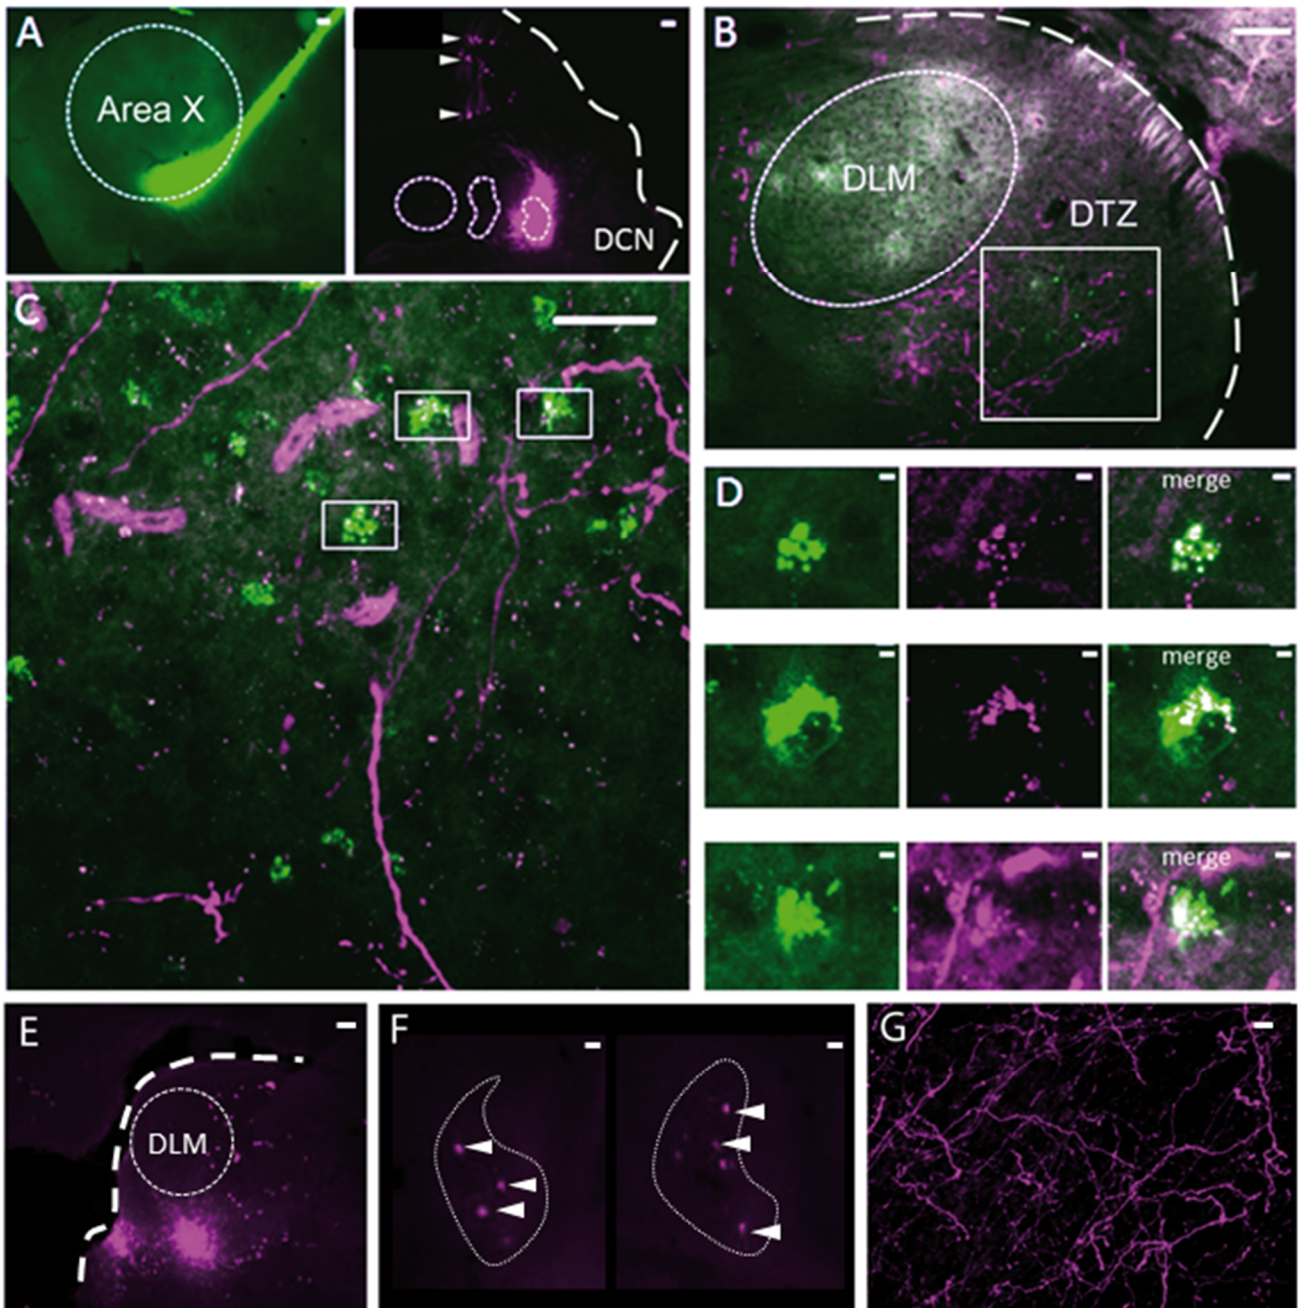

105 **Figure 1: Anatomical connection between DCN and Area X** (A) Injection sites of cholera toxin B in Area X  
106 (green, left panel) and Dextran Alexa 594 in DCN (magenta, right panel). Dotted lines delimit Area X (left  
107 panel) and all three DCN (right panel). The large dotted line delimits the brain slice contour. Retrograde  
108 labeling of Purkinje cells projecting to the DCN targeted by dye injection can be observed (right panel,  
109 arrowheads). Scale bar: 100 $\mu$ m. (B-C): Close contacts are observed in the dorsal thalamic zone (DTZ) for a  
110 magnification of x4 (B, scale: 100 $\mu$ m) and x20 (C, scale: 100 $\mu$ m). The dotted line in B delimits nucleus DLM,

111 while the white square in B and C indicates magnification location. Efferent fibers from Area X in DLM result in  
112 diffuse green labeling of the nucleus, while green cell somas in DTZ reflect afferent neurons. Red-labeled fibers  
113 from the DCN surround Area X-projecting neurons in DTZ. DLM: dorsolateral nucleus of the anterior thalamus.  
114 (D): Three example of close contacts between fibers from the DCN (magenta, middle panel) and soma of  
115 neurons projecting to Area X (green, left panel) in DTZ. Each panel in D corresponds to a magnification of  
116 squares indicated in C. The merge suggests an anatomical connection (right panel). Scale bar: 2 $\mu$ m. (E) Injection  
117 sites of Dextran Alexa 594 in DTZ. The large dotted line delimits slice contours, and the dotted circle represents  
118 DLM. Scale bar: 100 $\mu$ m. (F) Two examples of retrograde labelling in the lateral DCN following DTZ injection  
119 showed in E. Both examples are from the same animal, at two different depths. Arrowheads indicate DCN cell  
120 soma labelled. The dotted line delimits the lateral DCN contours. Scale bar: 20 $\mu$ m (G) Example of anterograde  
121 labelling in Area X. Only fibers (but no soma) are observed in Area X after DTZ injection. Scale bar: 2 $\mu$ m.

122

123 - *The connection from DCN to basal ganglia is functional*

124 We then sought to determine whether the pathway revealed anatomically from the cerebellum to  
125 the basal ganglia is sufficiently efficient to drive activity within the basal ganglia. To this end we  
126 investigated the responses evoked by DCN electrical stimulation in Area X neurons.

127 Most neurons are silent or display very little spontaneous activity in Area X under anesthesia,  
128 whereas a minority of them displays high spontaneous activity (>25 spikes/sec, see Methods). These  
129 spontaneously active neurons are most likely pallidal-like neurons (Leblois et al., 2009; Person and  
130 Perkel, 2007). Hereafter, this population of neurons, at least some of which are area X projection  
131 neurons (Goldberg et al., 2012; Leblois et al., 2009), will be referred as pallidal neurons. DCN  
132 stimulation provoked a strong increase in the firing rate of most, if not all, pallidal neurons, as shown  
133 on the example depicted in Fig. 2B. Indeed, when a response was evoked by single-pulse stimulation  
134 in at least one pallidal neuron in Area X, all subsequently recorded neurons were also responsive to the  
135 stimulation. The response profile following DCN stimulation at a given intensity differed, however,  
136 between different pallidal neurons. This diversity of response shapes could be classified as follows:  
137 single excitatory responses (observed in 71% of case, Fig. 2C, bottom), biphasic responses with  
138 excitation followed by inhibition (observed in 19% of case, Fig.2C, middle), or triphasic responses  
139 with a rapid inhibition followed by an excitation and a late inhibition (observed in 10% of case,  
140 Fig.2C, top). A change in the response profile could also be evoked by varying the stimulation  
141 intensity: higher stimulation intensity induced biphasic or triphasic responses, while lower stimulation  
142 intensity only caused excitation. Therefore, different profiles of response can be found in the same  
143 neuron depending on the stimulation intensity used. Previous studies have shown that excitatory inputs  
144 to Area X can drive such biphasic or triphasic responses in pallidal neurons due to feedforward  
145 inhibition mediated by local inhibitory neurons (Leblois et al., 2009). The response latencies between  
146 the onset of the stimulation pulse and the onset of the excitatory response (see Methods) were broadly  
147 distributed from 10 to 50 ms (20.80 ms +/- 4.56 ms, median: 21 ms, Fig. 2D). While short latency  
148 responses (10-20 ms) can be naturally explained by a disynaptic excitatory transmission from the DCN

149 to Area X through DTZ, biphasic and triphasic responses involve longer latencies and feedforward  
 150 inhibition within Area X likely participates. Indeed, fast feedforward inhibition within Area X can  
 151 delay the response of pallidal neurons to their excitatory inputs (Leblois et al., 2009), as it is the case  
 152 in the mammalian striatum (Mallet et al., 2005). Altogether, these results show that stimulation of  
 153 DCN neurons can drive the activity of pallidal neurons in Area X, confirming that they receive a  
 154 functional input from the cerebellum.

155

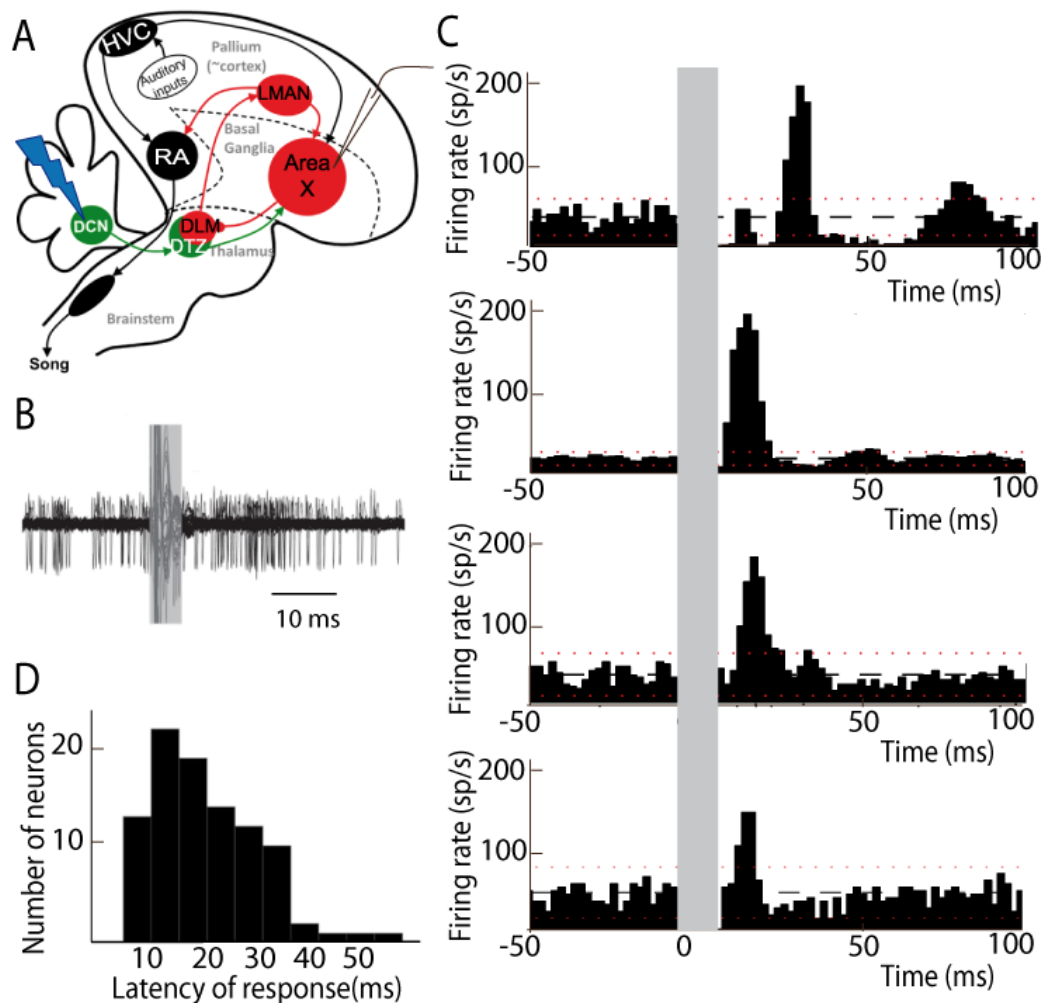

156

157 **Figure 2: Deep cerebellar stimulation elicits strong excitation in pallidal cells of Area X** (A) Diagram of the  
 158 song system in songbirds. In black, the cortical motor pathway necessary for song production. In red, the basal  
 159 ganglia-thalamo-cortical loop composed of the basal ganglia nucleus Area X, the thalamic nucleus DLM, and the  
 160 cortical nucleus LMAN. In green, the cerebello-thalamo-basal ganglia pathway. Stimulations are performed in  
 161 the DCN during the recording of pallidal neurons in Area X. HVC: used as a proper name, RA: robust nucleus of  
 162 the archopallium, LMAN: lateral magnocellular nucleus of the anterior nidopallium, DLM: medial portion of the  
 163 dorsolateral nucleus of the anterior thalamus, DTZ: dorsal thalamic zone, DCN: deep cerebellar nuclei. (B)  
 164 Twenty superimposed extracellular recording traces around DCN stimulation showing the increase in the number  
 165 of spikes produced by a representative pallidal neuron following DCN stimulation (grey rectangle) compared to  
 166 baseline firing. (C) Peri-stimulus-time-histograms (PSTHs) representing the firing rate of 4 different pallidal  
 167 neurons around DCN stimulation (time bin: 2 ms). The black horizontal dashed line depicts the mean baseline

168 firing rate and red dotted lines indicate confidence intervals (2.5 SD away from the mean baseline firing rate).  
169 Different response profiles are shown: excitation only (the two in the bottom, stimulation at 0.2 and 0.5 mA),  
170 biphasic response (second PSTH from top, stimulation at 1 mA), or inhibition and biphasic response (top,  
171 stimulation at 2 mA). (D) Distribution of response latency between DCN stimulation and the beginning of the  
172 excitatory response (20.80 ms +/- 4.56 ms, median: 21 ms).

173

174 - *The thalamic region DTZ mediates the cerebello-basal ganglia pathway*

175 Our anatomical results strongly suggest that DTZ mediates Area X neuronal responses to  
176 cerebellar stimulation. To demonstrate that the connection is indeed functionally mediated by DTZ,  
177 we blocked glutamatergic transmission in DTZ while monitoring the responses in Area X to DCN  
178 stimulation. We pressure-injected AMPA/kainate (2,3-dihydroxy-6-nitro-7-sulfamoyl-benzo  
179 quinoxaline-2,3-dione, NBQX) and NMDA (2-amino-5-phosphonovaleric acid, APV) receptor  
180 antagonists to block all glutamatergic transmission within DTZ (see Methods, Fig. 3A) as the  
181 cerebellar projections to the thalamus are mediated by glutamate in rats (Kuramoto et al., 2009, 2011).  
182 Figure 3B shows an example of the change in the response of a pallidal neuron to DCN stimulation  
183 following the injection of glutamatergic blockers in DTZ. As our hypothesis predicts, the excitation  
184 that DCN stimulation induced in this pallidal neuron was suppressed following drug injection. We  
185 then quantified the change in response induced by glutamatergic blockers in DTZ over the population  
186 of pallidal neurons we recorded under this pharmacological protocol (n=16 pallidal neurons in 8  
187 birds). The response strength and peak of the excitatory response (see Methods) were strongly reduced  
188 or totally suppressed when we blocked DTZ glutamatergic transmission. Mean response strength  
189 decreased from 0.55 +/- 0.13 spikes at baseline to 0.16 +/- 0.04 spikes following drug injection (paired  
190 Wilcoxon test, p=2.7642e-004, Fig.3C), and mean excitation peak from 99.35 +/- 23.41 Hz at baseline  
191 to 43.73 +/- 10.30 Hz following drug injection (paired Wilcoxon test, p=4.5523e-004). These results  
192 show that the responses to DCN stimulation in Area X pallidal neurons are mediated by glutamatergic  
193 transmission in DTZ.

194 Thalamo-striatal projections are glutamatergic in most vertebrates (Smith et al., 2004). It is thus  
195 natural to suppose that in zebra finches DTZ neuronal projections excite Area X neurons through  
196 glutamatergic transmission. We tested this hypothesis by blocking glutamatergic transmission around  
197 the pallidal neuron we were recording upon injection of the same drugs as above (Fig. 3D, n=8 pallidal  
198 neurons). We indeed confirmed that responses to DCN stimulation in pallidal neurons were abolished  
199 by the drug injection (Fig. 3E and F, n=8 pallidal neurons in 7 birds, response strength decreased from  
200 0.8 +/- 0.3 spikes at baseline to 0.16 +/- 0.05 spikes following drug injection (paired Wilcoxon test,  
201 p=0.0078), and mean excitation peak from 125.01 +/- 44.19 Hz at baseline to 29.61 +/- 10.47 Hz  
202 following drug injection (paired Wilcoxon test, p=0.0078).

203

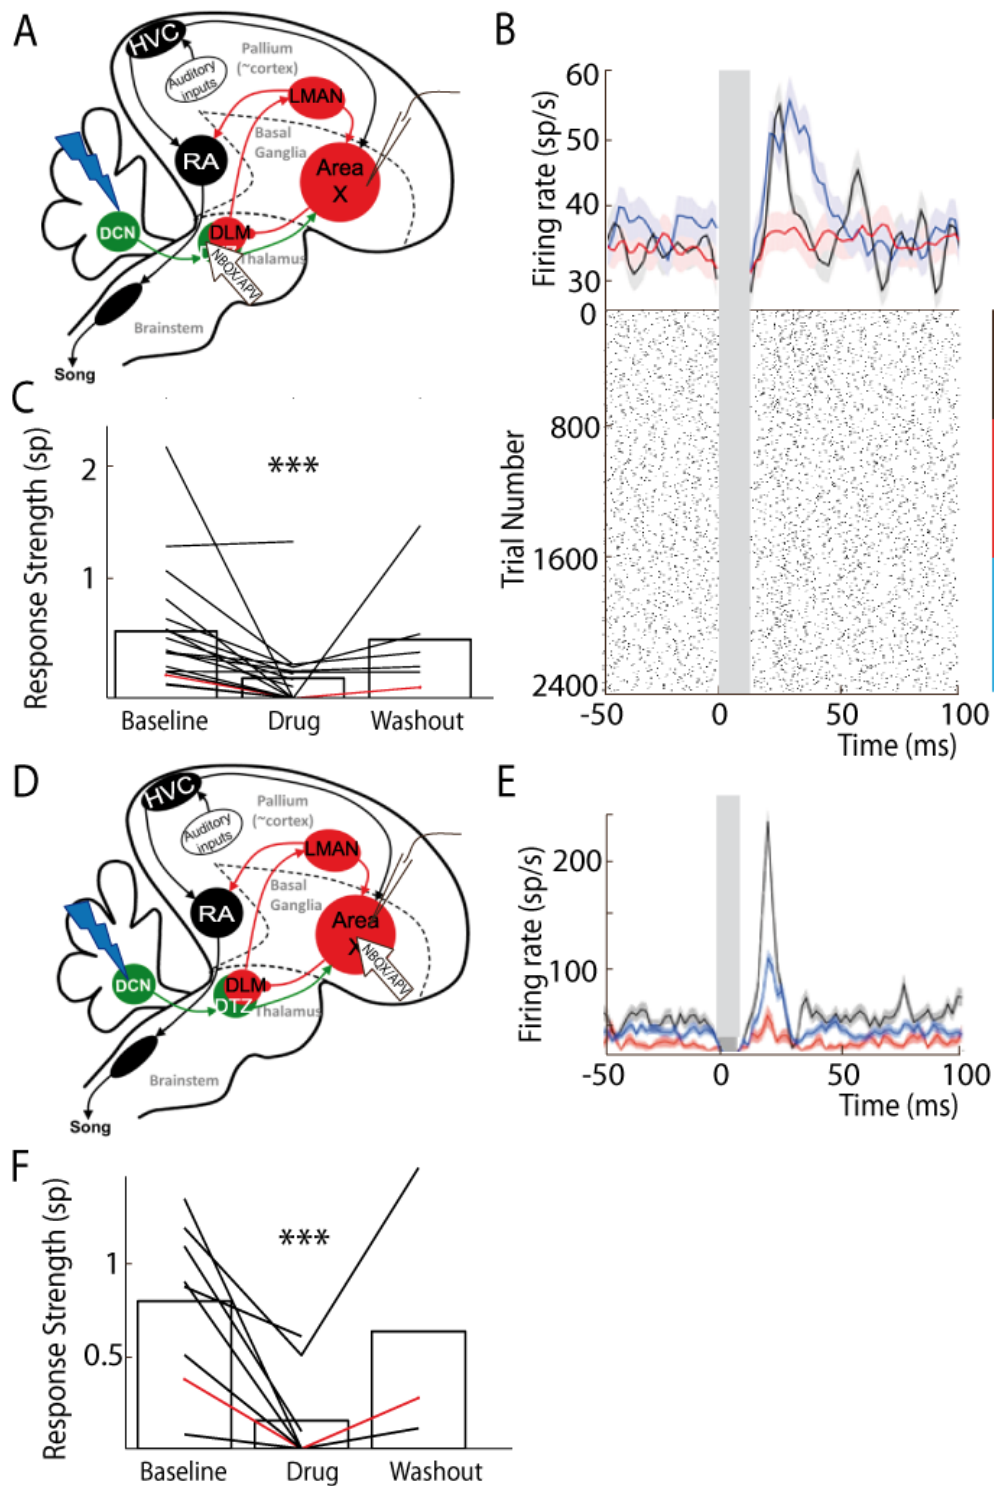

204

205 **Figure 3: Area X pallidal responses to DCN stimulation are transmitted through excitatory synapses in**  
 206 **DTZ and Area X.** (A) Diagram of the song system in songbirds, as in Fig. 2A. Recordings are performed in  
 207 Area X, NBQX/APV is applied in DTZ. (B) PSTH (top part) of a typical pallidal neuron before (black), during  
 208 (red) and after (blue, washout) drug application in DTZ, and their corresponding raster plots (bottom part). (C)  
 209 Population data showing the response strength of pallidal neurons in the three conditions (baseline, drug and  
 210 washout, n=16 pallidal neurons in 8 birds, paired Wilcoxon test, p value<0.001). The red curve represents the  
 211 example shown in B. (D) Diagram of the song system. Recordings were performed in Area X, NBQX/APV was  
 212 applied in Area X in proximity to the recorded neuron. (E) PSTH representing the firing rate of one pallidal



213 neuron, before (black), during (red) and after (blue, washout) drug application in Area X. Baseline activity after  
214 drug application (red) sometimes slightly decreases in Area X neurons compared to before drug application  
215 (black), but no significant change was observed over all neurons recorded in this condition. (F) Population data  
216 showing the evolution of response strength before, during and after drug application (n=8 pallidal neurons in 7  
217 birds, paired Wilcoxon test, p value<0.001). The red curve represents the example shown in E.

218

219 - *LMAN does not mediate Area X responses to DCN stimulation.*

220 We cannot completely exclude that drug injected in DTZ leaked into DLM because of  
221 diffusion in the brain tissue, and that this would block a response mediated by the well-known DLM-  
222 LMAN-Area X pathway. To rule this alternative explanation out, we applied in LMAN a cocktail of  
223 AMPA and NMDA receptor antagonists while monitoring pallidal responses to DCN stimulation (Fig.  
224 4A, top). We found no significant difference in the excitatory response of pallidal neurons to DCN  
225 stimulation between baseline and drug application conditions (Fig. 4B and 4C, n= 12 cortical neurons  
226 in 6 birds, response strength from 1.49 +/- 0.5 spikes at baseline to 1.34 +/- 0.38 spikes following drug  
227 injection, paired Wilcoxon test, p=0.479; mean excitation peak from 211.07 +/- 49.75 Hz at baseline to  
228 200.11 +/- 47.16 Hz following drug injection, paired Wilcoxon test, p=0.5444). Following each  
229 experiment we conducted upon drug injection in LMAN, we controlled for the efficacy of the pressure  
230 injection through the glass pipette by also performing a drug injection within Area X around the  
231 recorded pallidal neurons (Fig. 4C, inset, n= 5 pallidal neurons in 5 birds , DCN stimulation response  
232 strength decreased from 1.32 +/- 0.59 spikes at baseline to 0.35 +/- 0.16 spikes following drug  
233 injection, paired Wilcoxon test, p=0.0079; mean excitation peak reduced from 182.40 +/- 81.57 Hz at  
234 baseline to 57.30 +/- 25.62 Hz following drug injection, paired Wilcoxon test, p=0.0159). These  
235 results confirm that glutamatergic transmission in LMAN is not involved in the pallidal response to  
236 DCN stimulation, ruling out a transmission through the DLM-LMAN-Area X pathway.

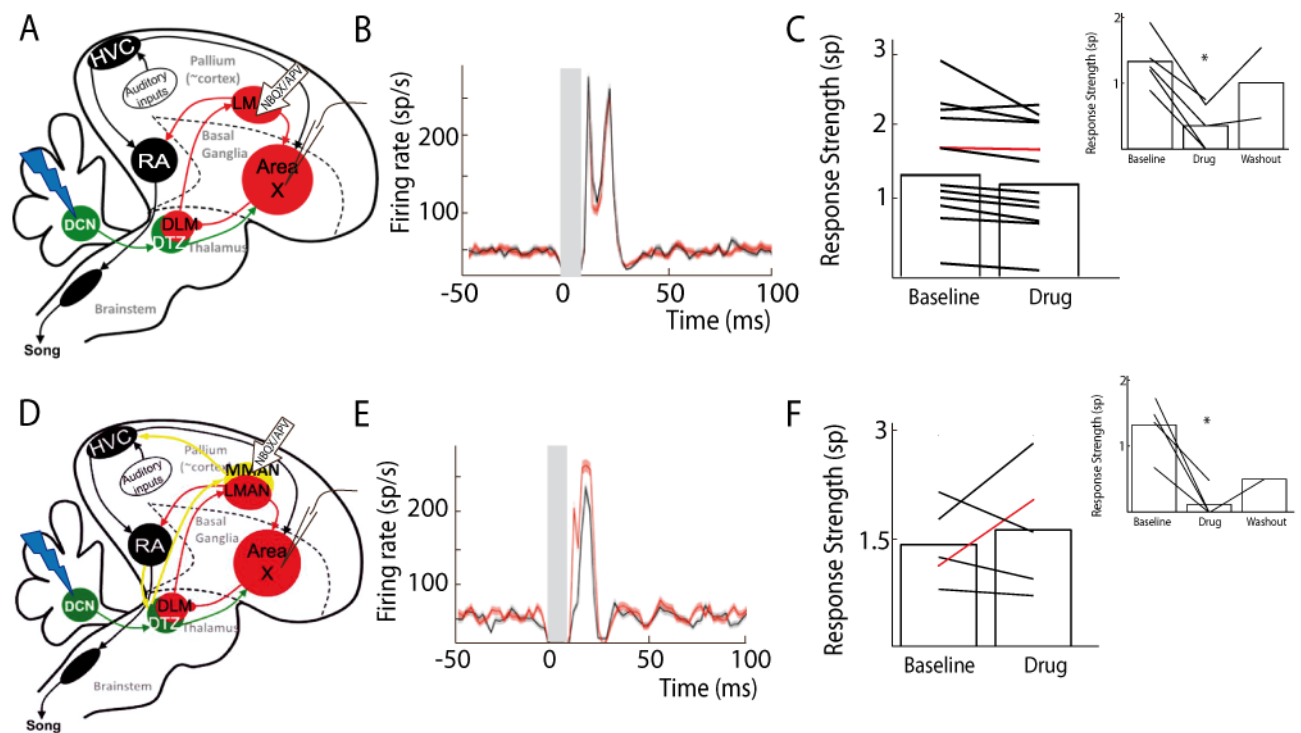

237

238 **Figure 4: Area X pallidal responses to DCN stimulation are not transmitted through cortical nuclei**  
 239 **LMAN or MMAN.** (A) Diagram of the song system. Recordings are performed in Area X, NBQX/APV is  
 240 applied in LMAN. (B) PSTH representing the firing rate of a pallidal neuron around DCN stimulation before  
 241 (black) and during (red) drug application in LMAN. (C) Population data showing no change in response strength  
 242 before and during LMAN glutamatergic blockade (n=12 pallidal neurons in 6 birds, paired Wilcoxon test, non-  
 243 significant). The red curve represents the example shown in B. Inset: confirmation of drug efficiency by  
 244 applying drug on the recorded pallidal neuron (n=5 pallidal neurons in 5 birds, paired Wilcoxon test, p<0.01).  
 245 (D) Diagram of the song system. Recordings are performed in Area X, NBQX/APV is applied in MMAN, a  
 246 nucleus projecting to HVC. (E) PSTH representing the firing rate of pallidal neuron before (black) and during  
 247 (red) drug application in MMAN. (F) Population data showing the evolution of response strength before and  
 248 during glutamatergic blockade in MMAN (n=5 pallidal neurons in 2 birds, paired Wilcoxon test, non-  
 249 significant). The red curve represents the example shown in E. Inset: confirmation of drug efficiency by applying  
 250 drug on the recorded pallidal neuron (n=5 pallidal neurons in 2 birds, paired Wilcoxon test, p<0.05).

251

252 - *MMAN is not involved in Area X responses to DCN stimulation*

253 In songbirds, DTZ, receiving input from the cerebellum, is composed of several thalamic  
 254 regions as described previously by anatomical studies (Person et al., 2008; Vates et al., 1997). One of  
 255 these regions, called the dorsal medial posterior thalamic zone (DMP) sends a projection to the medial  
 256 part of the magnocellular nucleus (MMAN) (Foster et al., 1997; Nicholson and Sober, 2015). MMAN  
 257 is in turn implicated in a pathway to the song-related motor nuclei HVC (used as a proper name) and  
 258 RA (Williams et al., 2012). As HVC projects to Area X in the song-related basal ganglia-thalamo-  
 259 cortical circuit (Nottebohm et al., 1976, 1982), we wondered whether the response we observed in

260 Area X could be conveyed through the MMAN-HVC-X pathway. To rule out this possibility, we  
261 blocked glutamatergic transmission in MMAN while monitoring pallidal responses to DCN  
262 stimulation (Fig. 4D). We found no significant effect of the drug injection in MMAN on the responses  
263 of pallidal neurons to DCN stimulation (Fig. 4E and 4F,  $n = 5$  pallidal neurons in 2 birds, response  
264 strength from  $1.43 \pm 0.24$  spikes at baseline to  $1.63 \pm 0.43$  spikes following drug injection,  
265 Wilcoxon test,  $p = 0.8125$ ; mean excitation peak from  $246.20 \pm 110.10$  Hz at baseline to  $258.80 \pm$   
266  $115.74$  Hz following drug injection, paired Wilcoxon test,  $p = 0.4375$ ). As previously, we checked the  
267 efficacy of the pressure injection through the glass pipette in Area X at the end of each experiment  
268 (Fig. 4F, inset,  $n = 5$  pallidal neurons, from  $1.33 \pm 0.66$  spikes at baseline to  $0.12 \pm 0.06$  spikes  
269 following drug injection, Wilcoxon test,  $p = 0.0286$ ; mean excitation peak from  $238.50 \pm 119.25$  Hz at  
270 baseline to  $35.00 \pm 17.50$  Hz following drug injection, paired Wilcoxon test,  $p = 0.0268$ ). This  
271 experiment ruled out the possible transmission of pallidal responses to DCN stimulation through the  
272 MMAN-HVC-Area X pathway.

273 In conclusion, the results of our electrophysiological experiments provide strong evidence that  
274 the cerebellum is linked to the song-related basal ganglia nucleus Area X through a functional  
275 excitatory connection involving a glutamatergic projection from the DCN to DTZ, and a glutamatergic  
276 projection from DTZ to Area X.

277 - *The cerebellar responses are conveyed to LMAN through the basal ganglia loop*

278 In songbirds, Area X is known to be part of the basal ganglia-thalamo-cortical circuit  
279 homologous to the motor loop of the basal ganglia-thalamo-cortical networks in mammals (Brainard  
280 and Doupe, 2002). In the following experiments we tested whether responses observed in the pallidal  
281 neurons after DCN stimulation were conveyed to the output nucleus of the basal ganglia-thalamo-  
282 cortical loop, namely LMAN (Fig. 5A). We recorded LMAN neurons and found that DCN stimulation  
283 elicited strong responses in all LMAN neurons recorded (Fig. 5B). This response is composed of two  
284 excitatory components: a strong and rapid excitation, and a long and slow one. Such bimodal  
285 excitatory response with two peaks was found in 10% ( $n = 3/30$ ) of the LMAN neurons recorded. For  
286 the majority of recorded LMAN neurons (90%,  $n = 27/30$ ), we saw only one of the two excitatory  
287 phases provoked by DCN stimulation. The latency of excitatory responses in LMAN neurons was  
288 therefore spread in a bimodal distribution (Fig. 5C) with two widely different peaks: a first peak  
289 between 10 and 50 ms ( $26 \pm 7.8$  ms, median: 19ms, 28% of all recorded LMAN neurons,  $n = 8/30$ ),  
290 and a second peak around 100 ms ( $125 \pm 32$  ms, median: 110 ms, 72 % of all recorded LMAN  
291 neurons,  $n = 22/30$ ). Interestingly, these two peaks in the latency distribution in LMAN neurons  
292 mirrored the inhibitory responses observed in Area X pallidal neurons. Indeed, Area X neurons  
293 displayed inhibitory responses either preceding or following the excitatory component of their  
294 response. An inhibition in Area X pallidal neurons, many of which project to the thalamic nucleus

295 DLM (Fee and Goldberg, 2011; Leblois et al., 2009), induces a fast excitatory response in DLM  
296 neurons (Goldberg et al., 2012; Leblois et al., 2009; Person and Perkel, 2007) and thereby activates  
297 LMAN through DLM excitatory projections (Leblois et al., 2009). The first excitation in LMAN  
298 neurons, around 20 ms latency, could therefore be mediated by the fast inhibition observed in pallidal  
299 neurons (Fig.2C, top panel). Similarly, the slow inhibitory component of pallidal responses to DCN  
300 stimulation, with a mean latency of 28ms (28.2 +/- 9.5 ms, data not shown), likely activates the DLM-  
301 LMAN pathway with much longer latencies (>50 ms) and may therefore drive the second excitation in  
302 LMAN. To confirm that the response in LMAN neurons is mediated by Area X, we blocked  
303 glutamatergic transmission in Area X to prevent local responses to DCN stimulation (Fig.5D, left  
304 panel). Hereafter, the response strength is calculated as the total area of the response, containing the  
305 two peaks of excitation when they are present. After application of the glutamatergic blockers to Area  
306 X, responses disappeared in LMAN (Fig.5E), with a significant reduction or suppression of excitatory  
307 response over all LMAN neurons recorded (Fig.5F, n= 14 multiunit recording, from 2.04 +/- 0.54  
308 spikes at baseline to 0.89 +/- 0.23 spikes following drug injection, paired Wilcoxon test, p=0.0012;  
309 mean peak excitation from 27.31 +/- 7.29 Hz at baseline to 10.88 +/- 2.90 Hz following drug injection,  
310 paired Wilcoxon test, p= 3.6621e-004).

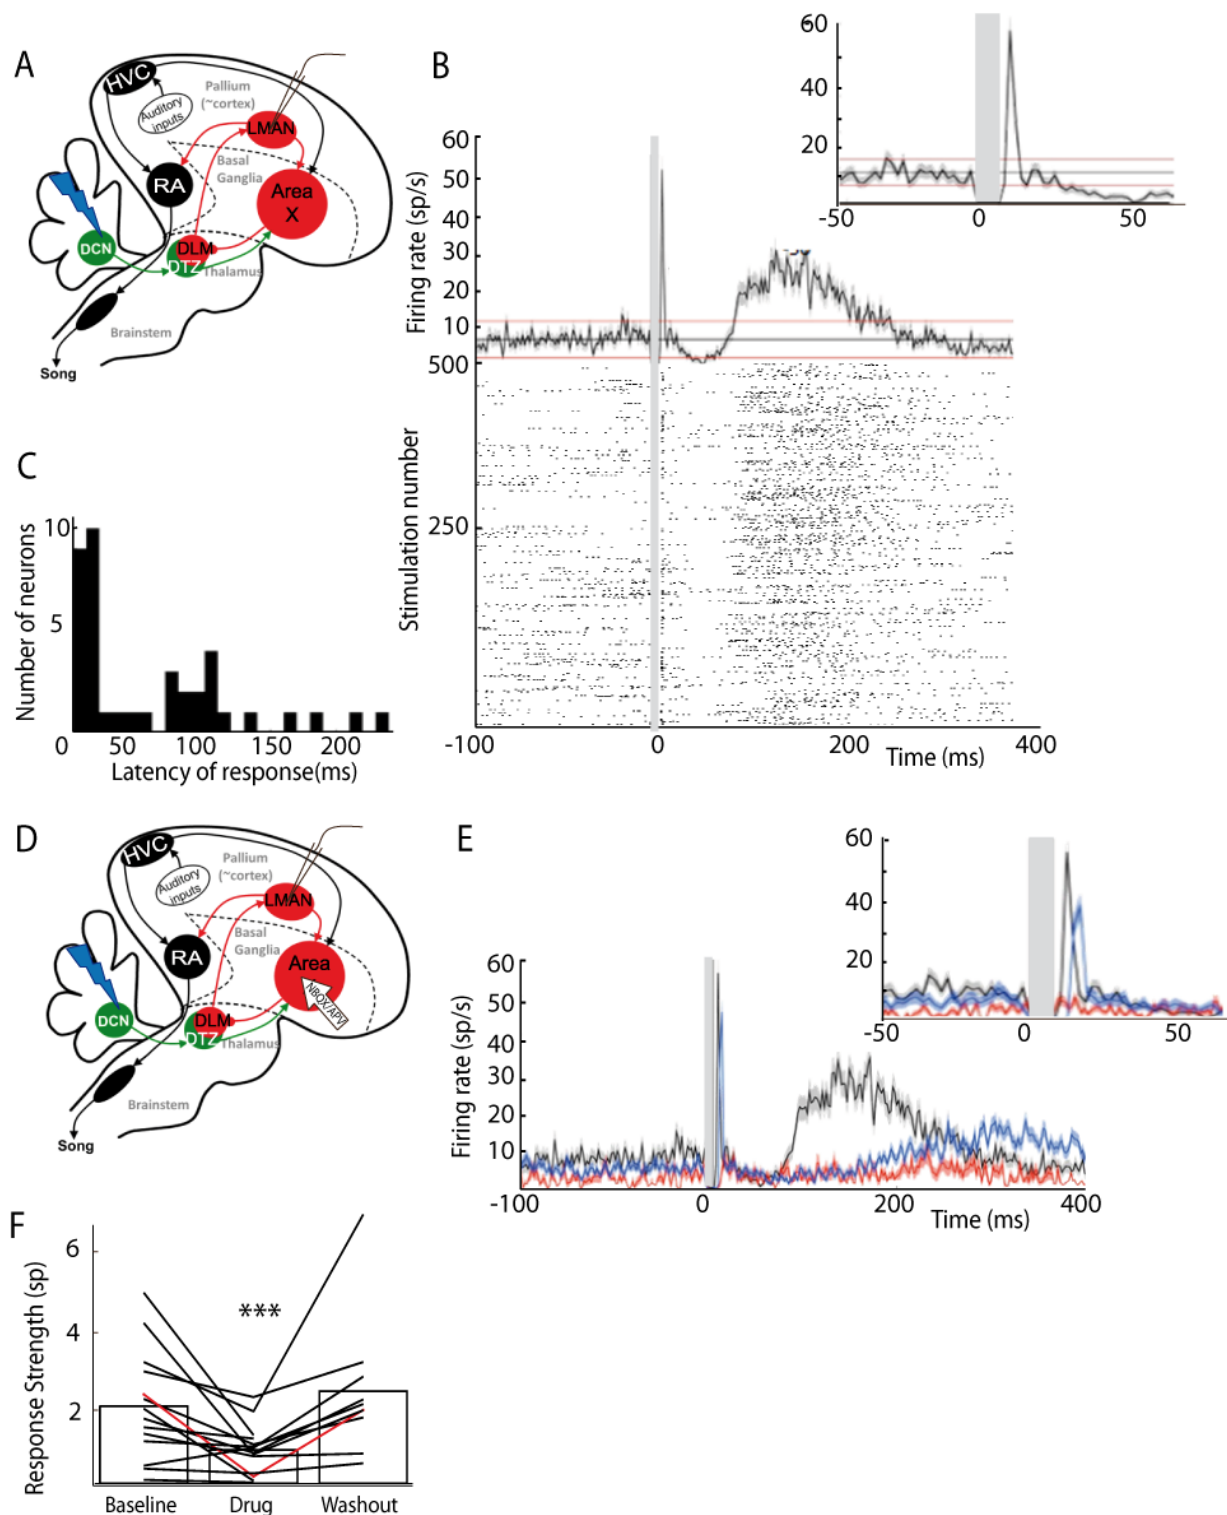

311

312 **Figure 5: LMAN neurons display bimodal responses to DCN stimulation mediated by Area X** (A) Diagram  
 313 of the song system, as in Fig. 2A. Neurons were recorded in LMAN during DCN stimulation (B) Example  
 314 response in a typical LMAN recording following DCN stimulation with the corresponding raster plot (multiunit  
 315 recording). Inset: magnification of the first excitatory peak. (C) Distribution of response latency over all LMAN  
 316 recordings displaying the two characteristic peaks of response (first peak: 10-30 ms and second peak: 100 ms,  
 317 see Results, time bin: 10ms). (D) Diagram of the song system, as in Fig. 2A. NBQX/APV is applied in Area X  
 318 and neurons are recorded in LMAN during DCN stimulation. (E) Example response following DCN stimulation  
 319 from a typical recording in LMAN (multiunit recording), before (black), during (red) and after (blue, washout)  
 320 the drug application. (F) Population data showing the evolution of response strength over the three periods

321 (baseline, drug, washout, n= 14 multiunit recording in 5 birds, paired-Wilcoxon test, p-value=0.001). The red  
 322 curve represents the example shown in E.

323

324 - *The cerebellum can influence the discharge of RA neurons*

325 The basal ganglia-thalamo-cortical loop affects song production and drives song plasticity via  
 326 its projection to nucleus RA (Andalman and Fee, 2009; Bottjer et al., 1984). We tested whether DCN  
 327 stimulation also drives responses in RA neurons via the basal ganglia-thalamo-cortical loop (Fig. 6A).  
 328 DCN stimulation induced strong excitatory responses in RA neurons (Fig. 6C, black curve) with  
 329 latencies in the range from 10 to 100 ms ( $30.2\text{ms} \pm 7.8\text{ms}$ , median: 16 ms). Blocking glutamatergic  
 330 transmission in LMAN significantly reduced the excitatory response to DCN stimulation in RA  
 331 neurons (Fig. 6C and 6D, n=6 neurons in 5 birds, response strength decreased from  $0.8 \pm 0.32$  spikes  
 332 at baseline to  $0.29 \pm 0.12$  spikes following drug injection, Wilcoxon test,  $p=0.0087$ ; mean excitation  
 333 peak from  $186.66 \pm 76.20$  Hz at baseline to  $71.18 \pm 29.06$  Hz following drug injection, paired  
 334 Wilcoxon test,  $p=0.0156$ ).

335

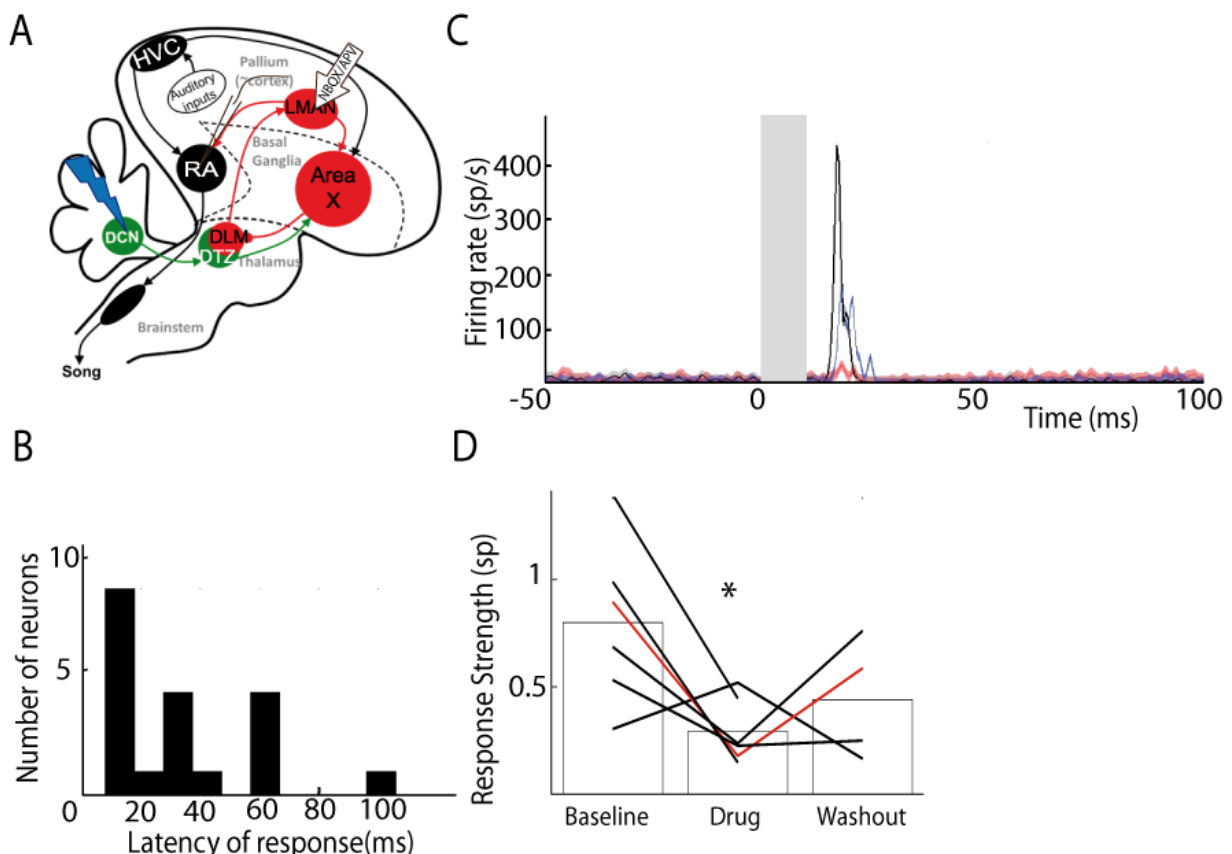

336 **Figure 6: RA responses to DCN stimulation can be partially suppressed by blocking glutamatergic**  
 337 **transmission in LMAN.** (A) Diagram of the song system, as in Fig. 2A. Neurons were recorded in RA during  
 338 DCN stimulation, NBQX/APV was applied in LMAN. (B) Distribution of RA neurons response latencies (time  
 339 bin: 10ms). (C) PSTH representing the firing rate of a typical RA neuron before (black), during (red) and after  
 340 (washout, blue). (D) Population data showing the change of response strength over the three periods (baseline,

341 drug, washout, n=6 neurons in 5 birds, paired Wilcoxon test, p-value<0.05). The red curve represents the  
342 example shown in C.

343

344 - *DCN lesion impairs song learning in juvenile zebra finches*

345 Our experiments provide strong evidence for a functional disynaptic cerebellum-thalamus-  
346 basal ganglia pathway in songbirds. This pathway can drive the output nucleus of the basal ganglia-  
347 thalamo-cortical loop, LMAN, and can influence the premotor activity of RA neurons.

348 Song learning strongly relies on the basal ganglia-thalamo-cortical loop (Bottjer et al., 1984;  
349 Brainard and Doupe, 2002; Nottebohm et al., 1976; Scharff and Nottebohm, 1991). As we  
350 demonstrated that the cerebellar connection to the basal ganglia-thalamo-cortical loop is efficient, we  
351 tested the hypothesis that the cerebellum contributes to song learning. Juvenile zebra finches were  
352 subjected to partial lesions in their lateral DCN, either electrolytic (n=7) or chemical using ibotenic  
353 acid (n=3). Figure 7D displays the spectrograms of the song motifs produced by a tutor and its two  
354 fledglings, one of them with a DCN lesion. The juvenile bird that underwent the DCN lesion copied  
355 fewer syllables than his control brother. We compared the quality of tutor imitation in young male  
356 juveniles undergoing partial DCN lesion or sham surgery. To this end, we compute a similarity score  
357 based on the peak crosscorrelation between the spectra of the tutor's motifs and of the juvenile's  
358 songs. This score may be affected by both acoustic and temporal features of the song (see methods). In  
359 sham-lesion juvenile birds, the similarity score between the juvenile's song and the tutor's song motif  
360 was increased between the day preceding the sham-lesion surgery and the crystallization stage (before  
361 lesion:  $0.27 \pm 0.12$ ; at 90 dph:  $0.44 \pm 0.09$ ; paired Wilcoxon test,  $p=0.04$ ,  $df=5$ ; Fig 7E). On the  
362 contrary, tutor song imitation did not improve in juvenile birds following partial lesions in the lateral  
363 DCN (before lesion:  $0.33 \pm 0.15$ ; at 90 dph:  $0.35 \pm 0.13$ ; paired Wilcoxon test,  $p=0.06$ ,  $df=9$ ; Fig 7E).  
364 Moreover, there was a significant correlation between the proportion of the lateral DCN that was left  
365 unaffected and the quality of the tutor song imitation ( $r=0.57$ ,  $p=0.03$ ; Fig 7F). In adult birds, DCN  
366 lesion did not induce any detectable change in syllable acoustic features (results not shown). In  
367 conclusion, our lesion experiment shows that the cerebellum contributes to song learning in juvenile  
368 zebra finches.

369

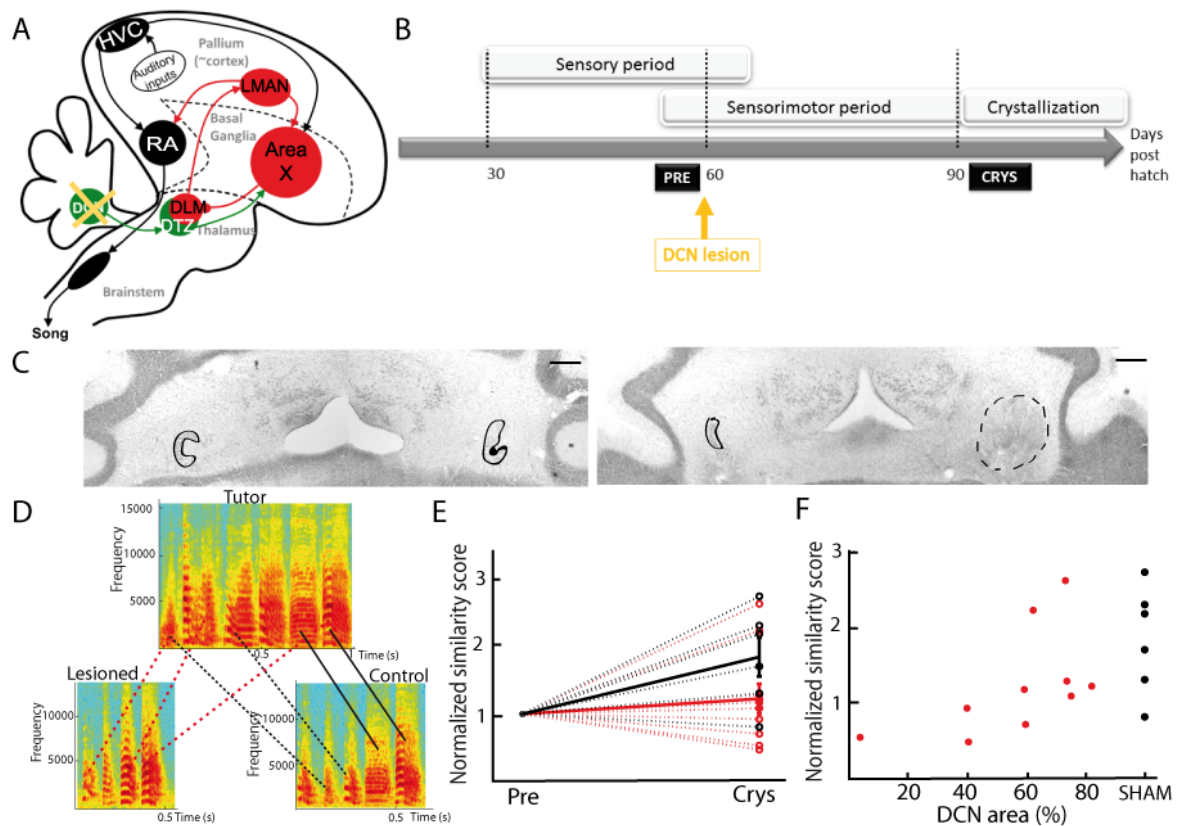

370

371 **Figure 7: DCN lesions impair song learning and reduce the similarity to tutor song after crystallization.**  
 372 (A) Diagram of the song system, as in Fig. 2A, representing DCN lesion. (B) Diagram of the song learning  
 373 periods in songbirds: the sensory period, the sensorimotor period in which juveniles start to produce sounds,  
 374 and the crystallization phase. Lesions were made at 60 dph. (C) Nissl staining on horizontal slices showing the deep  
 375 cerebellar nuclei. The black lines delimit in the two hemispheres the lateral nuclei. The dotted line (right panel)  
 376 delimits the lesion site. Left: control bird. Right: bird with DCN lesion. (D) Examples of three spectrograms of  
 377 tutor and juveniles song motifs at crystallization: top: tutor song motif, bottom left: song motif of a juvenile with  
 378 DCN lesion, bottom right: control juvenile. Solid lines connect two similar syllables found in the tutor and  
 379 juvenile song motifs, dotted lines between two syllables reflect a partial copy of the tutor syllable (red lines for  
 380 the juvenile with DCN lesion, black lines for the control juvenile). (E) Population data showing the evolution of  
 381 similarity between the day before the lesion (pre) and the crystallization period (90 dph) in juveniles with sham  
 382 lesions (black dots for individuals, solid black line for the mean) and DCN lesions (red dots for individual, solid  
 383 red line for the mean). Data are normalized over the pre-lesion period (see Methods for the normalization, n=10  
 384 birds with lesion, n=6 sham birds, Wilcoxon test,  $p < 0.05$ ). (F) Normalized similarity score plotted as a function  
 385 of the total area left from the lateral DCN (%) for juveniles with DCN lesion (red dots, n=10 lesion birds) or  
 386 sham lesion (black dots, n=6 sham birds). A significant correlation was revealed between the similarity and the  
 387 proportion of lateral DCN left intact ( $r = 0.57$ ,  $p < 0.05$ ).

388

389

390



391 **Discussion:**

392 Previous investigations into the neural mechanisms of vocal learning in songbirds have  
393 focused on the contribution of pallial and basal ganglia circuits (Mooney, 2009), ignoring a possible  
394 contribution of the cerebellum to avian song learning. Here, we bring strong evidence that the  
395 cerebellum interacts with song-specific circuits in the basal ganglia and participates to song learning in  
396 juvenile birds. Indeed, we have demonstrated that the DCN project via a disynaptic pathway to the  
397 song-related basal ganglia nucleus Area X and that the cerebellum is able to modulate Area X output,  
398 its cortical target, and the premotor nucleus RA, via a thalamic relay. These results are reminiscent of  
399 the cerebello-thalamo-basal ganglia pathway recently discovered in mammals (Bostan et al., 2010;  
400 Chen et al., 2014). We also demonstrate that the cerebellum contributes to song learning, as a lesion in  
401 the DCN impaired song learning in juvenile birds.

402 - *Partial lesions in the cerebellum*

403 The DCN receive strong convergent input from the inferior olive and from Purkinje cells from  
404 many functional territories in the cerebellar cortex (Apps and Garwicz, 2005). Given this strong  
405 convergence of multi-modal inputs to the DCN, large bilateral lesions in the DCN can strongly impair  
406 vital sensorimotor abilities potentially leading to a high post-operative mortality. We therefore limited  
407 the extent of our lesions to reduce the impact on global function. Still, transient motor impairments  
408 were observed during first couple of days following surgery that disappeared rapidly as the birds  
409 resumed perching and singing. While behavioral monitoring ensured that global functions were  
410 normal when we quantified the effect of lesions on song, we cannot totally exclude the fact that non-  
411 specific motor effects of the lesions were partially responsible for our song-specific behavioral results.  
412 To rule out this experimental limitation regarding partial lesions, specific lesions of the cerebello-  
413 thalamic projection should be performed in the future.

414 - *Several types of Area X neuron are potentially involved in the cerebello-thalamo-basal  
415 ganglia pathway*

416 Our results indicate that the cerebellar input to the basal ganglia modulates the activity of  
417 pallidal neurons in Area X, but we did not directly investigate the response of other neuronal types in  
418 this structure. Area X contains all the neuron types found in the striatum and pallidum in mammals  
419 (Farries and Perkel, 2000, 2002): pallidal neurons, medium spiny neurons and many striatal  
420 interneuron types. Only pallidal neurons, however, project outside of Area X; these share  
421 physiological, biochemical and anatomical properties of mammalian pallidal neurons (Carrillo and  
422 Doupe, 2004). Area X pallidal neurons display strong spontaneous activity both *in vitro* (Budzillo et  
423 al., 2017; Farries and Perkel, 2000, 2002) and *in vivo* (Person and Perkel, 2007; Goldberg and Fee,  
424 2010) and can therefore be distinguished from the other neuronal populations in Area X, the  
425 spontaneous activity of which is much lower (Person and Perkel, 2007; Leblois et al., 2009; Goldberg

426 and Fee, 2010). Given the strongly bimodal distribution of spontaneous activity observed in our  
427 recording (see methods) and the relative scarcity of neurons displaying a low spontaneous activity in  
428 Area X (Farries and Perkel, 2002), our dataset is likely to contain mostly if not only pallidal neurons.  
429 A contribution from a small fraction of spontaneous striatal interneurons cannot, however, be ruled  
430 out.

431 - *Similarities and differences between the cerebello-thalamo-basal ganglia pathways of*  
432 *mammals and songbirds*

433 In mammals, a pathway connecting the cerebellum and the striatum through the thalamus was  
434 demonstrated in rodents (Chen et al., 2014) and monkeys (Hoshi et al., 2005). However, it remains  
435 unknown whether and how these cerebellar inputs are conveyed to basal ganglia output neurons and to  
436 their thalamo-cortical targets ultimately affecting behavior (Alexander, 1994; Alexander et al., 1990).  
437 Here, we show in songbirds that the cerebellar signals travel through the basal ganglia-thalamo-  
438 cortical circuit and can drive firing in song-related premotor neurons in RA. In monkeys, the dentate  
439 nucleus can be divided into two parts : the dorsal part, which has reciprocal projections with motor and  
440 premotor cortical areas via the motor thalamus, and the ventral part, which has reciprocal projections  
441 with associative and other non-motor cortical areas via non-motor thalamic regions (Dum and Strick,  
442 2003; Kelly and Strick, 2003; Orioli and Strick, 1989). Additionally, anatomical tracing showed that  
443 some projections to the thalamus also come from the interpositus and the fastigial nuclei (25%)  
444 (Bostan et al., 2010; Hoshi et al., 2005). In songbirds, our tracing experiments showed that DTZ  
445 projects to the song-related basal ganglia nucleus Area X and receives extensive axonal projections  
446 from the most lateral of DCN, analogous to the dentate nucleus in mammals (Arends and Zeigler,  
447 1991; Sultan and Glickstein, 2007; Voogd and Glickstein, 1998). We found no dorso-ventral contrast  
448 in our anatomical results and thus make no distinction between potential motor and non-motor parts of  
449 the lateral nucleus. Bidirectional tracer injections in DTZ however revealed a weaker, but consistent,  
450 projection from the intermediate nucleus, analogous to nucleus interpositus in mammals (Arends and  
451 Zeigler, 1991; Sultan and Glickstein, 2007; Voogd and Glickstein, 1998). The anatomical labeling in  
452 the intermediate nucleus was less intense compared to the lateral nucleus, suggesting that it sends  
453 weaker projections to the thalamus. Both nuclei seem, however, to project to DTZ and may thereby be  
454 involved in the cerebello-thalamo-basal ganglia pathway studied here.

455 During our electrophysiological experiments, the stimulation electrode placement targeted the  
456 most lateral DCN, as confirmed histologically. Although unlikely, we cannot completely exclude that  
457 the stimulation current could spread into the intermediate nucleus and activate projection neurons there  
458 as well. Indeed, the size of the stimulated area is not well controlled (Ranck, 1975; Tehovnik et al.,  
459 2006). This raises the possibility that the intermediate nucleus could also be involved in the neural  
460 responses observed in the basal ganglia-thalamo-cortical loop following DCN stimulation. Further

461 investigations to assess the role of the putative connections between the intermediate nucleus and the  
462 thalamus therefore remain needed.

463 In monkeys, the dorsal part of striatum, dedicated to motor functions, receives thalamic  
464 projections (Parent and Hazrati, 1995). In songbirds, the song-related basal ganglia nucleus Area X is  
465 a rostro-ventral structure. The ventral position of this nucleus is an unusual feature of the song system  
466 given its motor function (Brainard and Doupe, 2002). Because Area X contains a mixture of striatal  
467 and pallidal neurons (Farries and Perkel, 2000, 2002), we were not able to distinguish if the thalamic  
468 fibers arrive on striatal neurons firstly as it has been shown in mammals (Smith et al., 2004), on the  
469 pallidal neurons directly, or both. While we focused on the thalamic projection on Area X, thalamic  
470 projections may also reach other parts of the avian basal ganglia. Determining which thalamic area  
471 projects to which neurons in the basal ganglia will however require multiple tracing studies and was  
472 therefore left for future investigations.

473 - *Is the cerebello-thalamo-basal ganglia pathway the only functional pathway connecting*  
474 *cerebellum to the song system?*

475 Beyond a subcortical connection between the dentate nucleus and the basal ganglia described  
476 in mammals, the cerebellum is also known to project to the motor part of the thalamus, which in turn  
477 projects to the motor cortex (Kelly and Strick, 2003). This disynaptic connection between the  
478 cerebellum and the motor cortex is known to be important in motor control and motor coordination  
479 (Brooks, 1984). In songbirds, RA is considered as a premotor nucleus (McCasland, 1987), and its  
480 efferent projections are equivalent to descending projections from M1 to brainstem and spinal circuits  
481 in mammals (Medina and Reiner, 2000; Zeier and Karten, 1971). While we have revealed a  
482 subcortical connection between the cerebellum and basal ganglia which indirectly affects premotor  
483 activity in RA, no direct connection from the cerebellum to a thalamo-cortical circuit including RA  
484 has been described yet in songbirds. Nevertheless, DTZ, which mediates cerebellar input to the basal  
485 ganglia, is also known to project to the pallial nucleus MMAN, which in turn projects to HVC (Foster  
486 et al., 1997; Nicholson and Sober, 2015; Williams et al., 2012). As HVC directly projects to RA  
487 through the cortical pathway controlling song production, a DCN-DTZ-MMAN-HVC-RA projection  
488 may represent the functional equivalent of the mammalian cerebello-thalamo-cortical pathways. This  
489 new pathway should be characterized by anatomical and electrophysiological experiments to assess  
490 the impact of cerebellar input on the cortical pathway during song learning and production.

491 - *Potential impact of cerebellar input on basal ganglia*

492 We have shown that a cerebello-thalamo-basal ganglia pathway exists in songbirds, is  
493 functional and shares many similarities with the mammalian cerebello-thalamo-basal ganglia pathway.  
494 Knowing the role of the cerebellum and the basal ganglia respectively in supervised and reinforcement  
495 learning (Doya, 2000), we hypothesize that the cerebellum can participate in basal ganglia functions

496 by sending an error-correction signal related to a detected mismatch between actual and predicted  
497 sensory feedbacks. This error correction signal will be integrated into the basal ganglia to drive the  
498 motor command output during the learning process. In this hypothesis, both the reward prediction  
499 error signal driving reinforcement learning and the cerebellar error correction signal would cooperate  
500 within the basal ganglia to achieve faster and more efficient sensorimotor learning. Alternatively, the  
501 cerebellar input could modulate the cortico-striatal plasticity (Chen et al., 2014) and thereby regulate  
502 the learning rate in basal ganglia circuits.

503 In songbirds, motor variability and error correction in song involve the basal ganglia-  
504 thalamo-cortical loop (Andalman and Fee, 2009; Kao and Brainard, 2006; Olfeczký et al., 2005;  
505 Tumer and Brainard, 2007). Indeed, this circuit is necessary for the induction of song plasticity  
506 (Andalman and Fee, 2009; Brainard and Doupe, 2002). Lesions (Olfeczký et al., 2005; Tumer and  
507 Brainard, 2007) or reversible inactivation (Andalman and Fee, 2009) of the output of the cortico-basal  
508 ganglia loop reduces song variability and impairs error correction during song learning (Andalman and  
509 Fee, 2009; Olfeczký et al., 2005; Tchernichovski et al., 2001). These functions presently attributed to  
510 the basal ganglia-thalamo-cortical loop could also be influenced by the cerebellum through its  
511 subcortical connection to the basal ganglia nucleus Area X.

512 The cerebellum is implicated in diverse sensorimotor processes (Ackermann, 2008; Izawa et  
513 al., 2012) and cerebellar lesions prevent good performance in sensorimotor tasks like reaching (Izawa  
514 et al., 2012), vocal production (Ackermann, 2008) or the vestibulo-ocular reflex (Ito, 1998), among  
515 others. Moreover, the subcortical pathway from cerebellum to basal ganglia is involved in dystonia  
516 (Calderon et al., 2011; Fremont et al., 2017; Neychev et al., 2008; Tewari et al., 2017). The existence  
517 of the cerebello-thalamo-basal ganglia pathway makes the songbird model, classically used as a model  
518 to study vocal learning, a good model for further investigations of the cooperation between cerebellum  
519 and basal ganglia in sensorimotor learning and its dysfunction in movement disorders.

520

## 521 **Materials and Methods:**

522 - *Animals :*

523 All the experiments were performed in adult male zebra finches (*Taeniopygia guttata*), >90 days post-  
524 hatch unless otherwise specified. Birds were either reared in our breeding facility or provided by a  
525 local supplier (Oisellerie du Temple, L'Isle d'Abeau, France). All animals had constant access to  
526 seeds, crushed oyster shells and water. Seeds supplemented with fresh food and water were provided  
527 daily. Birds were housed on a natural photoperiod (both in the aviary and in sound isolation boxes  
528 during the behavioral experiment). Animal care and experiments were carried out in accordance with  
529 the European directives (2010-63-UE) and the French guidelines (project 02260.01, Ministère de

530 l'Agriculture et de la Forêt). Experiments were approved by *Paris Descartes University* ethics  
531 committee (Permit Number: 13-092).

532 - *Surgery* :

533 Before surgery, birds were first food-deprived for 20-30 min, and an analgesic was administered just  
534 before starting the surgery (meloxicam, 5 mg/kg). The anesthesia was then induced with a mixture of  
535 oxygen and 3-5% isoflurane during 5 minutes. Birds were then moved to the stereotaxic apparatus and  
536 maintained under anesthesia with 1% isoflurane. Xylocaine (31.33mg/mL) was applied under the skin  
537 before opening the scalp. Small craniotomies were made above the midline reference point, the  
538 bifurcation of the midsagittal sinus, and above the structures of interest. Stereotaxic zero in  
539 anteroposterior and mediolateral axis was determined by the sinus junction. To ease the access to the  
540 cerebellum, we used a head angle of 50°. The stereotaxic coordinates used for each brain structure are  
541 summed up in Table 1.

| Structure | Head angle (°) | Arm angle (°) | Antero-post (mm) | Medio-lateral (mm) | Depth (mm) |
|-----------|----------------|---------------|------------------|--------------------|------------|
| Area X    | 50             | 0             | 4.0              | 1.5                | 3.0-4.0    |
|           | 50             | 15            | 4.0              | 2.7                | 3.5-4.5    |
| DCN       | 50             | 15            | -2               | 2.5                | 3.5        |
|           | 50             | 0             | -1.5/-1.8/-2.1   | 1.3                | 3.4        |
| DTZ       | 50             | 0             | 0-0.3            | 1.2                | 4.3-4.5    |
| LMAN      | 50             | 0             | 4.1              | 1.8                | 2.3-2.5    |
|           | 50             | 15            | 4.1              | 3.0                | 2.4-2.6    |
| MMAN      | 50             | 0             | 4.1              | 0.5                | 2.3-2.5    |
|           | 50             | 15            | 4.1              | 1.7                | 2.4-2.6    |

542 **Table 1: Stereotaxic coordinates summary.** Head and arm angle (on the mediolateral axis) are expressed in  
543 degrees, anteroposterior and mediolateral coordinates are expressed in millimeters from the sinus junction, and  
544 depth coordinates in millimeters from the surface of the brain. DCN: deep cerebellar nuclei. LMAN: lateral  
545 magnocellular nucleus of the nidopallium, MMAN: medial magnocellular nucleus of the nidopallium, HVC:  
546 used as a proper name, DTZ: dorsal thalamic zone.

547 - *Anatomical tracing* :

548 We performed iontophoretic injections of fluorescent dye using dextran conjugates with Alexa 594  
549 (ThermoFischer, 5% in PBS 0.1M 0.9% saline) in targeted cerebral structures (lateral DCN and Area X  
550 nucleus) using a glass pipette with a small (10µm) tip and ±5 µA DC pulses of 10 s duration, 50%  
551 duty cycle, applied for 3 min. In the cerebellum, to be sure that the injection was constrained to the  
552 lateral deep cerebellar nucleus, we verified that the retrograde labeling of Purkinje cells was limited  
553 the most lateral sagittal zone (Fig.1A).

554 In additional tracing experiments, 250 nL of cholera toxin tracers coupled with Alexa 488  
555 (ThermoFischer, diluted in PBS 0.1M 0.9% saline) were pressure-injected with a Hamilton syringe  
556 (1 $\mu$ L, Phymep, Paris, France), at 100nL per minute, at each injection site (2 injection sites per brain  
557 hemisphere). Birds were then housed individually for three days after injection to allow for dye  
558 transport.

559 - *In vivo electrophysiology* :

560 Recordings in Area X, LMAN, and RA were made with a tungsten electrode with epoxy isolation  
561 (FHC, impedance varying from 3.0 to 8.0 M $\Omega$  depending on the type of neuron recorded). Acquisition  
562 of the signal was done with the AlphaOmega software, using low-pass (frequencies below 8036 Hz)  
563 and high-pass (frequencies above 268 Hz) filters to only detect the spike signal. The sampling  
564 frequency was 22320 Hz. In area X, the recorded neurons displayed a bimodal distribution of  
565 spontaneous firing rate, above 25 Hz or under 10 Hz. We considered neurons with frequency above  
566 25Hz as pallidal neurons in Area X (Leblois et al., 2009; Person and Perkel, 2007). Others neurons in  
567 Area X with spontaneous firing rates under 10Hz were not taken into account in the present study.  
568 Note that the level of spontaneous activity is different under anesthesia compared to what was seen in  
569 awake birds (Goldberg et al., 2010) and can vary depending on the specific drug used (Brooks, 1984).  
570 This may explain the slight difference in spontaneous activity among neurons recorded here as  
571 pallidal, compared to previous studies performed under urethane anesthesia (Leblois et al., 2009;  
572 Person et al., 2007), known to preserve awake-like cortical activity (Albrecht et al., 1990).

573 A single-pulse electrical stimulation in the lateral deep cerebellar nucleus (DCN) was applied through  
574 a bipolar electrode during recording of different structures in the contralateral basal ganglia nucleus  
575 (Area X), the lateral part of the magnocellular nucleus (LMAN), the medial part of the magnocellular  
576 nucleus (MMAN), and robust archopallium nucleus (RA). The duration of the stimulation was 1 ms,  
577 with an inter-stimulation time of 1.6 s, and the intensity ranged from 0.1 to 4 mA. Despite long  
578 stimulation duration, observed responses in recorded neurons were stable over time. We aimed to  
579 place the stimulation electrode within the lateral cerebellar nucleus, and the positioning of the  
580 electrode was confirmed histologically (see next paragraph). However, we cannot completely rule out  
581 that the stimulation current did spread to the nearby interpositus nucleus.

582 - *Pharmacology* :

583 During electrophysiological experiments, drugs were applied locally by pressure with small tip glass  
584 pipette (10 $\mu$ m) and nitrogen picospritzer (Phymep, Paris, France). We used a mix of NBQX 5mM  
585 (Sigma Aldrich, diluted in PBS 0.1M 0.9% saline) and APV 1mM (Sigma Aldrich, diluted in PBS  
586 0.1M 0.9% saline) to block glutamate receptors.

587 - *Data analysis*:

588 Analyses of recorded neurons after DCN stimulation were done using Spike 2 and Matlab. Spike  
589 sorting was performed with the software Spike2 (CED, UK), using principal components analysis of  
590 spike waveforms. For Area X neurons, and RA neurons, we managed to record single units, and we  
591 focus on these single unit neurons in the analysis. In the LMAN and MMAN, we chose to record  
592 mostly multiunit activity. Indeed, most neurons in these nuclei exhibit very low spontaneous activity  
593 ( $\sim 1$  sp/s), leading to wide fluctuation in the PSTH estimate of baseline activity preceding stimulation  
594 with high temporal resolution (time bin: 10ms) and making it difficult to estimate response latency,  
595 strength and duration. Instead multi-unit activity with higher baseline levels allows better baseline  
596 statistics and narrower confidence intervals for the detection of the response to stimulation.

597

598 Spike train analysis was then performed using Matlab (MathWorks, Natick, MA, USA). We calculated  
599 peri-stimulus time histograms (PSTH) of recorded neurons after DCN stimulation. PSTHs were  
600 calculated with a 2-ms bin for neurons in Area X and RA. For structures with low firing rate (LMAN  
601 and MMAN) the time bin was 10 ms to limit bin-to-bin fluctuations in spike count. We calculated the  
602 mean and the standard deviation (SD) of the firing rate over the period preceding the stimulation  
603 (50ms for Area X and RA, 100 ms for LMAN and MMAN), and we considered that a neuron  
604 exhibited a significant response to the stimulation when at least two consecutive bins of the PSTH  
605 were above (for excitation) or below (for inhibition) the spontaneous mean firing rate  $\pm 2.5 \cdot \text{SD}$ . The  
606 return of two consecutive bins at the spontaneous mean firing rate  $\pm 2.5 \cdot \text{SD}$  indicated the end of the  
607 response. We defined the latency of response as the time between the stimulation onset and the  
608 beginning of the first excitatory or inhibitory response. Response strength was calculated as the sum of  
609 the difference between the PSTH values and the mean baseline firing rate over the entire response  
610 period, and represents the average number of excess (default) spikes induced by a single stimulation.  
611 For neurons in Area X and RA, the response strength was calculated over the first peak of excitation  
612 only (as most responses did not elicit two peaks of excitation, see Results). For LMAN and MMAN  
613 neurons recording, neurons tended to display bimodal responses (see Results) and both the first and  
614 second excitation peaks were taken into account to calculate the response strength. We also report the  
615 peak firing rate in the response period as the maximal value of the PSTH. The PSTHs are displayed  
616 either as histograms or as solid curves with gray shaded area surrounding the curve representing the  
617 SD of the baseline firing rate.

618 - *Lesion experiments* :

619 Lesions were performed in the DCN of juvenile zebra finches. We targeted the most lateral DCN,  
620 analogous to the dentate nuclei in mammals. In a first group of birds ( $n=7$ ), a unilateral electrolytic  
621 lesion was performed in the lateral deep cerebellar nucleus by passing 0.05mA during 30 seconds  
622 through a tungsten electrode. Lesions were made at three points (see the stereotaxic coordinates in  
623 Table1, DCN coordinates, second row). In a second experimental group ( $n=3$ ), chemical partial lesion

624 was performed using ibotenic acid in 1 $\mu$ L Hamilton syringe, with a rate of 100nL/min. We also  
625 performed injections at three locations (see Table1, DCN coordinates) injecting 150nL per point.  
626 Sham lesions were performed in another group of age-matched juvenile birds. Sham birds underwent  
627 the same surgery as the lesion group, with a stimulating electrode was placed at the lesion location but  
628 no current was applied. Both lesion and sham protocols were done around 57 days post hatch (56,8 +/-  
629 7,5 days post hatch for lesion group, 57.0 +/- 4,5 days post hatch for sham group). Following surgery,  
630 the behavior of birds was closely monitored for a few days to ensure proper recovery. Many birds  
631 underwent temporary motor deficits (postural and balance troubles) for a couple of days but recovered  
632 very quickly and were all perching and feeding normally 48h after surgery. Singing usually resumed  
633 after 48h, or at most after 72h. Each juvenile (sham and lesion) was put in a recording box one week  
634 before the lesion experiment, and recorded using Sound Analysis Pro software (SAP, Tchernichovski  
635 et al., 2001). To prevent any deficit due to the lack of tutor, we presented the tutor to the juvenile two  
636 hours per day until the bird underwent the surgery. All birds had same access to their respective tutors.  
637 After the surgery, each juvenile was recorded until the crystallization phase (30 days after the surgery  
638 experiment).

639 - *Histology :*

640 For the anatomical tracing protocol: Birds were sacrificed with a lethal intraperitoneal injection of  
641 pentobarbital (Nembutal, 54.7mg/mL), perfused intracardially with PBS 0.01M followed by 4%  
642 paraformaldehyde as fixative. The brain was removed, post-fixed in 4% for 24h, and cryoprotected in  
643 30% sucrose. We then cut 40 $\mu$ m thick sections in the parasagittal plane with a freezing microtome.  
644 Slices were mounted with Mowiol (Sigma Aldrich) and observed under an epifluorescence (Leica  
645 Microsystems, Leica DM 1000, Nanterre, France) or a confocal microscope (Zeiss, LSM 710, France).  
646 Images were analyzed using ImageJ software (Rasband WS, NIH, Bethesda, Maryland, USA).

647 After electrophysiological recordings, the bird was perfused as described above. Then, brain was  
648 removed, post-fixed one day in PFA 4%, store in sucrose 30%, and we did 60 $\mu$ m slices with Nissl  
649 staining to control the stimulation electrode and recording electrode tracts.

650 For the lesion protocol: All juvenile birds were sacrificed at 100 dph using the protocol previously  
651 described for tracing protocol. We then cut 60 $\mu$ m-thick cerebellar sections in the horizontal plane with  
652 a freezing microtome. We did Nissl staining to check lesions locations. Slices were mounted with  
653 Mowiol (Sigma Aldrich) and observed under a transmitted-light microscope (Leica Microsystems,  
654 Leica DM1000, Nanterre, France). With ImageJ software (Rasband WS, NIH, Bethesda, Maryland,  
655 USA), we calculated the area of lesion for each nucleus compared to the control nucleus in the other  
656 hemisphere.

657 - *Song analysis :*



658 Songs were continuously recorded using Sound Analysis Pro software (SAP, Tchernichovski et al.,  
659 2001). Songs were then sorted and analyzed using custom Matlab (MathWorks, Natick, MA, USA)  
660 programs. Briefly, the program detected putative motifs based on peaks in the cross-correlation  
661 between the sound envelope of the recorded sound file and a clean preselected motif. Putative motifs  
662 were then sorted based on their spectral similarity with the pre-selected clean motif, using thresholds  
663 set by the experimenter. This analysis allowed us to successfully sort >98% of the songs produced by a  
664 bird on a given day (assessed by comparing hand sorting with the automated sorting by the program).  
665 We calculated the spectrogram of each extracted song (fast Fourier transforms using 256-point  
666 Hanning windows moved in 128-point steps).

667 For each family including a juvenile bird undergoing DCN lesion or sham-lesion, the spectrograms of  
668 10 randomly-selected and manually checked renditions of the stereotyped motif produced by the tutor  
669 were stored for comparison with the juvenile's songs. Among all songs produced by the juvenile in  
670 each considered condition: before lesion or at crystallization (all recordings from a single day of  
671 recording were considered for analysis in each condition: pre-surgery or after crystallization), 10  
672 randomly-selected songs were compared to the tutor's selected motifs using the following procedure.  
673 Cross-correlations were computed between all possible pairs of this subset. For each pair consisting of  
674 a tutor's motif and a juvenile's song, a cross-correlation index was calculated as the sum of the cross-  
675 correlation function between their two spectrograms, normalized by the square root of the product of  
676 their auto-correlation function. The average cross-correlation index over all 100 pairs was called the  
677 'spectral similarity index' between tutor and juvenile in that condition.

678 - *Statistics* :

679 Numerical values are given as mean  $\pm$  SD, unless stated otherwise.

680 Electrophysiology: As the goal of pharmacological experiments was to look at the effect of  
681 glutamatergic transmission blockade on baseline response strength induced by DCN stimulation, we  
682 compared the mean response strength during two conditions: the baseline condition and the drug  
683 condition. To do so we performed a paired Wilcoxon test between the control response and that after  
684 application of drugs. We used non-parametric statistical tests because of the small number of neurons  
685 recorded (less than 30 neurons in each experiment).

686 Behavior: Given our initial hypothesis that the cerebellum may contribute to song learning, we  
687 planned to compare the similarity between juvenile and tutor songs before and after surgery, as well as  
688 at crystallization (90 dph). This comparison was applied both in sham-lesion birds and in DCN lesion  
689 birds. The similarity scores in these two groups were compared between pre-surgery and  
690 crystallization period using a paired Wilcoxon test (MathWorks, Natick, MA, USA). Additionally, we  
691 tested whether there was a significant correlation between the size of the lesion and the improvement  
692 in tutor song imitation after surgery. To this end, we calculated the correlation coefficient between the

693 lesion size (proportion of DCN left unaffected, determined histologically for DCN lesion birds, and  
694 assigned to 100% for sham-lesion birds) and the normalized song similarity at crystallization  
695 (similarity at 90 days post hatch / similarity before surgery). We tested the hypothesis of no  
696 correlation: each p-value was determined as the probability of obtaining a correlation larger than the  
697 observed value by chance, when the true correlation is zero (MathWorks, Natick, MA, USA).

698

### 699 **Acknowledgements:**

700 We are grateful to Carole Levenes for valuable discussions and to Claude Meunier, David Hansel  
701 and David J Perkel for their comments on the manuscript. This work was supported by the Agence  
702 National pour la Recherche (ANR, program “Retour Post-Doc”, Grant number ANR-10-PDOC-0016)  
703 and by the city of Paris (program “Emergence”, Grant number DDEEES 2014-166).

### 704 **Competing interest:**

705 No competing interests declared.

706

### 707 **References:**

708 Ackermann, H. (2008). Cerebellar contributions to speech production and speech perception:  
709 psycholinguistic and neurobiological perspectives. *Trends Neurosci.* *31*, 265–272.

710 Albrecht, D., Davidowa, H., and Gabriel, H.J. (1990). Conditioning-related changes of unit activity in  
711 the dorsal lateral geniculate nucleus of urethane-anaesthetized rats. *Brain Res. Bull.* *25*, 55–63.

712 Albus, J. (1971). A theory of cerebellar function. In *Math Biosci.*, pp. 25–61.

713 Alexander, G.E. (1994). Basal ganglia-thalamocortical circuits: their role in control of movements. *J.*  
714 *Clin. Neurophysiol. Off. Publ. Am. Electroencephalogr. Soc.* *11*, 420–431.

715 Alexander, G.E., Crutcher, M.D., and DeLong, M.R. (1990). Basal ganglia-thalamocortical circuits:  
716 parallel substrates for motor, oculomotor, “prefrontal” and “limbic” functions. *Prog. Brain Res.* *85*,  
717 119–146.

718 Andalman, A.S., and Fee, M.S. (2009). A basal ganglia-forebrain circuit in the songbird biases motor  
719 output to avoid vocal errors. *Proc. Natl. Acad. Sci. U. S. A.* *106*, 12518–12523.

720 Apps, R., and Garwicz, M. (2005). Anatomical and physiological foundations of cerebellar information  
721 processing. *Nat. Rev. Neurosci.* *6*, 297–311.

722 Arends, J.J., and Zeigler, H.P. (1991). Organization of the cerebellum in the pigeon (*Columba livia*): I.  
723 Corticonuclear and corticovestibular connections. *J. Comp. Neurol.* *306*, 221–244.

- 724 Bostan, A.C., Dum, R.P., and Strick, P.L. (2010). The basal ganglia communicate with the cerebellum.  
725 Proc. Natl. Acad. Sci. U. S. A. *107*, 8452–8456.
- 726 Bottjer, S.W., Miesner, E.A., and Arnold, A.P. (1984). Forebrain lesions disrupt development but not  
727 maintenance of song in passerine birds. *Science* *224*, 901–903.
- 728 Brainard, M.S., and Doupe, A.J. (2002). What songbirds teach us about learning. *Nature* *417*, 351–  
729 358.
- 730 Brooks, V.B. (1984). Cerebellar functions in motor control. *Hum. Neurobiol.* *2*, 251–260.
- 731 Brooks, J.X., Carriot, J., and Cullen, K.E. (2015). Learning to expect the unexpected: rapid updating in  
732 primate cerebellum during voluntary self-motion. *Nat. Neurosci.* *18*, 1310–1317.
- 733 Budzillo, A., Duffy, A., Miller, K.E., Fairhall, A.L., and Perkel, D.J. (2017). Dopaminergic modulation of  
734 basal ganglia output through coupled excitation-inhibition. Proc. Natl. Acad. Sci. U. S. A. *114*, 5713–  
735 5718.
- 736 Calderon, D.P., Fremont, R., Kraenzlin, F., and Khodakhah, K. (2011). The neural substrates of rapid-  
737 onset Dystonia-Parkinsonism. *Nat. Neurosci.* *14*, 357–365.
- 738 Carrillo, G.D., and Doupe, A.J. (2004). Is the songbird Area X striatal, pallidal, or both? an anatomical  
739 study. *J. Comp. Neurol.* *473*, 415–437.
- 740 Chen, C.H., Fremont, R., Arteaga-Bracho, E.E., and Khodakhah, K. (2014). Short latency cerebellar  
741 modulation of the basal ganglia. *Nat. Neurosci.* *17*, 1767–1775.
- 742 Doupe, A.J., and Kuhl, P.K. (1999). Birdsong and human speech: common themes and mechanisms.  
743 *Annu. Rev. Neurosci.* *22*, 567–631.
- 744 Doupe, A.J., Perkel, D.J., Reiner, A., and Stern, E.A. (2005). Birdbrains could teach basal ganglia  
745 research a new song. *Trends Neurosci.* *28*, 353–363.
- 746 Doya, K. (2000). Complementary roles of basal ganglia and cerebellum in learning and motor control.  
747 *Curr. Opin. Neurobiol.* *10*, 732–739.
- 748 Dreher, J.-C., and Grafman, J. (2002). The roles of the cerebellum and basal ganglia in timing and  
749 error prediction. *Eur. J. Neurosci.* *16*, 1609–1619.
- 750 Dum, R.P., and Strick, P.L. (2003). An unfolded map of the cerebellar dentate nucleus and its  
751 projections to the cerebral cortex. *J. Neurophysiol.* *89*, 634–639.
- 752 Farries, M.A., and Perkel, D.J. (2000). Electrophysiological properties of avian basal ganglia neurons  
753 recorded in vitro. *J. Neurophysiol.* *84*, 2502–2513.
- 754 Farries, M.A., and Perkel, D.J. (2002). A telencephalic nucleus essential for song learning contains  
755 neurons with physiological characteristics of both striatum and globus pallidus. *J. Neurosci. Off. J.*  
756 *Soc. Neurosci.* *22*, 3776–3787.
- 757 Fee, M.S., and Goldberg, J.H. (2011). A hypothesis for basal ganglia-dependent reinforcement  
758 learning in the songbird. *Neuroscience* *198*, 152–170.

- 759 Foster, E.F., Mehta, R.P., and Bottjer, S.W. (1997). Axonal connections of the medial magnocellular  
760 nucleus of the anterior neostriatum in zebra finches. *J. Comp. Neurol.* *382*, 364–381.
- 761 Fremont, R., Tewari, A., Angueyra, C., and Khodakhah, K. (2017). A role for cerebellum in the  
762 hereditary dystonia DYT1. *eLife* *6*.
- 763 Gadagkar, V., Puzerey, P.A., Chen, R., Baird-Daniel, E., Farhang, A.R., and Goldberg, J.H. (2016).  
764 Dopamine neurons encode performance error in singing birds. *Science* *354*, 1278–1282.
- 765 Goldberg, J.H., Farries, M.A., and Fee, M.S. (2012). Integration of cortical and pallidal inputs in the  
766 basal ganglia-recipient thalamus of singing birds. *J. Neurophysiol.* *108*, 1403–1429.
- 767 Gómez, A., Durán, E., Salas, C., and Rodríguez, F. (2010). Cerebellum lesion impairs eyeblink-like  
768 classical conditioning in goldfish. *Neuroscience* *166*, 49–60.
- 769 Grillner, S., and Robertson, B. (2016). The Basal Ganglia Over 500 Million Years. *Curr. Biol.* *CB* *26*,  
770 R1088–R1100.
- 771 Hikosaka, O., Nakamura, K., Sakai, K., and Nakahara, H. (2002). Central mechanisms of motor skill  
772 learning. *Curr. Opin. Neurobiol.* *12*, 217–222.
- 773 Hoffmann, L.A., Saravanan, V., Wood, A.N., He, L., and Sober, S.J. (2016). Dopaminergic Contributions  
774 to Vocal Learning. *J. Neurosci. Off. J. Soc. Neurosci.* *36*, 2176–2189.
- 775 Hoshi, E., Tremblay, L., Féger, J., Carras, P.L., and Strick, P.L. (2005). The cerebellum communicates  
776 with the basal ganglia. *Nat. Neurosci.* *8*, 1491–1493.
- 777 Ito, M. (1984). The cerebellum and neural control.
- 778 Ito, M. (1998). Cerebellar learning in the vestibulo-ocular reflex. *Trends Cogn. Sci.* *2*, 313–321.
- 779 Izawa, J., Criscimagna-Hemminger, S.E., and Shadmehr, R. (2012). Cerebellar contributions to reach  
780 adaptation and learning sensory consequences of action. *J. Neurosci. Off. J. Soc. Neurosci.* *32*, 4230–  
781 4239.
- 782 Kao, M.H., and Brainard, M.S. (2006). Lesions of an avian basal ganglia circuit prevent context-  
783 dependent changes to song variability. *J. Neurophysiol.* *96*, 1441–1455.
- 784 Kelly, R.M., and Strick, P.L. (2003). Cerebellar loops with motor cortex and prefrontal cortex of a  
785 nonhuman primate. *J. Neurosci. Off. J. Soc. Neurosci.* *23*, 8432–8444.
- 786 Knudsen, E.I. (1994). Supervised learning in the brain. *J. Neurosci. Off. J. Soc. Neurosci.* *14*, 3985–  
787 3997.
- 788 Krakauer, J.W., and Mazzoni, P. (2011). Human sensorimotor learning: adaptation, skill, and beyond.  
789 *Curr. Opin. Neurobiol.* *21*, 636–644.
- 790 Kuhl, P.K., and Meltzoff, A.N. (1996). Infant vocalizations in response to speech: vocal imitation and  
791 developmental change. *J. Acoust. Soc. Am.* *100*, 2425–2438.
- 792 Kuramoto, E., Furuta, T., Nakamura, K.C., Unzai, T., Hioki, H., and Kaneko, T. (2009). Two types of  
793 thalamocortical projections from the motor thalamic nuclei of the rat: a single neuron-tracing study  
794 using viral vectors. *Cereb. Cortex N. Y. N* *1991* *19*, 2065–2077.

- 795 Kuramoto, E., Fujiyama, F., Nakamura, K.C., Tanaka, Y., Hioki, H., and Kaneko, T. (2011).  
796 Complementary distribution of glutamatergic cerebellar and GABAergic basal ganglia afferents to the  
797 rat motor thalamic nuclei. *Eur. J. Neurosci.* *33*, 95–109.
- 798 Leblois, A., Bodor, A.L., Person, A.L., and Perkel, D.J. (2009). Millisecond timescale disinhibition  
799 mediates fast information transmission through an avian basal ganglia loop. *J. Neurosci. Off. J. Soc.*  
800 *Neurosci.* *29*, 15420–15433.
- 801 Lewis, J.E., and Maler, L. (2004). Synaptic dynamics on different time scales in a parallel fiber  
802 feedback pathway of the weakly electric fish. *J. Neurophysiol.* *91*, 1064–1070.
- 803 Mallet, N., Le Moine, C., Charpier, S., and Gonon, F. (2005). Feedforward inhibition of projection  
804 neurons by fast-spiking GABA interneurons in the rat striatum in vivo. *J. Neurosci. Off. J. Soc.*  
805 *Neurosci.* *25*, 3857–3869.
- 806 Marr, D. (1969). A theory of cerebellar cortex. *J. Physiol.* *202*, 437–470.
- 807 McCasland, J.S. (1987). Neuronal control of bird song production. *J. Neurosci. Off. J. Soc. Neurosci.* *7*,  
808 23–39.
- 809 Medina, L., and Reiner, A. (2000). Do birds possess homologues of mammalian primary visual,  
810 somatosensory and motor cortices? *Trends Neurosci.* *23*, 1–12.
- 811 Mooney, R. (2009). Neurobiology of song learning. *Curr. Opin. Neurobiol.* *19*, 654.
- 812 Neychev, V.K., Fan, X., Mitev, V.I., Hess, E.J., and Jinnah, H.A. (2008). The basal ganglia and  
813 cerebellum interact in the expression of dystonic movement. *Brain J. Neurol.* *131*, 2499–2509.
- 814 Nicholson, D.A., and Sober, S.J. (2015). Disynaptic pathways from the cerebellum to the cortex and  
815 basal ganglia in a songbird (Chicago).
- 816 Nottebohm, F., Stokes, T.M., and Leonard, C.M. (1976). Central control of song in the canary, *Serinus*  
817 *canarius*. *J. Comp. Neurol.* *165*, 457–486.
- 818 Nottebohm, F., Kelley, D.B., and Paton, J.A. (1982). Connections of vocal control nuclei in the canary  
819 telencephalon. *J. Comp. Neurol.* *207*, 344–357.
- 820 Olveczky, B.P., Andalman, A.S., and Fee, M.S. (2005). Vocal experimentation in the juvenile songbird  
821 requires a basal ganglia circuit. *PLoS Biol.* *3*, e153.
- 822 Orioli, P.J., and Strick, P.L. (1989). Cerebellar connections with the motor cortex and the arcuate  
823 premotor area: an analysis employing retrograde transneuronal transport of WGA-HRP. *J. Comp.*  
824 *Neurol.* *288*, 612–626.
- 825 Parent, A., and Hazrati, L.-N. (1995). Functional anatomy of the basal ganglia. I. The cortico-basal  
826 ganglia-thalamo-cortical loop. *Brain Res. Rev.* *20*, 91–127.
- 827 Pekny, S.E., Izawa, J., and Shadmehr, R. (2015). Reward-dependent modulation of movement  
828 variability. *J. Neurosci. Off. J. Soc. Neurosci.* *35*, 4015–4024.
- 829 Person, A.L., and Perkel, D.J. (2007). Pallidal neuron activity increases during sensory relay through  
830 thalamus in a songbird circuit essential for learning. *J. Neurosci. Off. J. Soc. Neurosci.* *27*, 8687–8698.

- 831 Person, A.L., Gale, S.D., Farries, M.A., and Perkel, D.J. (2008). Organization of the songbird basal  
832 ganglia, including area X. *J. Comp. Neurol.* *508*, 840–866.
- 833 Ranck, J.B. (1975). Which elements are excited in electrical stimulation of mammalian central  
834 nervous system: a review. *Brain Res.* *98*, 417–440.
- 835 Raymond, J.L., Lisberger, S.G., and Mauk, M.D. (1996). The cerebellum: a neuronal learning machine?  
836 *Science* *272*, 1126–1131.
- 837 Redgrave, P., Prescott, T.J., and Gurney, K. (1999). The basal ganglia: a vertebrate solution to the  
838 selection problem? *Neuroscience* *89*, 1009–1023.
- 839 Scharff, C., and Nottebohm, F. (1991). A comparative study of the behavioral deficits following  
840 lesions of various parts of the zebra finch song system: implications for vocal learning. *J. Neurosci.*  
841 *Off. J. Soc. Neurosci.* *11*, 2896–2913.
- 842 Schultz, W., Dayan, P., and Montague, P.R. (1997). A neural substrate of prediction and reward.  
843 *Science* *275*, 1593–1599.
- 844 Smith, Y., Raju, D.V., Pare, J.-F., and Sidibe, M. (2004). The thalamostriatal system: a highly specific  
845 network of the basal ganglia circuitry. *Trends Neurosci.* *27*, 520–527.
- 846 Stephenson-Jones, M., Kardamakis, A.A., Robertson, B., and Grillner, S. (2013). Independent circuits  
847 in the basal ganglia for the evaluation and selection of actions. *Proc. Natl. Acad. Sci. U. S. A.* *110*,  
848 E3670-3679.
- 849 Sultan, F., and Glickstein, M. (2007). The cerebellum: Comparative and animal studies. *Cerebellum*  
850 *Lond. Engl.* *6*, 168–176.
- 851 Sutton, R.S., and Barto, A.G. (1981). Toward a modern theory of adaptive networks: expectation and  
852 prediction. *Psychol. Rev.* *88*, 135–170.
- 853 Tchernichovski, O., Mitra, P.P., Lints, T., and Nottebohm, F. (2001). Dynamics of the vocal imitation  
854 process: how a zebra finch learns its song. *Science* *291*, 2564–2569.
- 855 Tehovnik, E.J., Tolias, A.S., Sultan, F., Slocum, W.M., and Logothetis, N.K. (2006). Direct and indirect  
856 activation of cortical neurons by electrical microstimulation. *J. Neurophysiol.* *96*, 512–521.
- 857 Tewari, A., Fremont, R., and Khodakhah, K. (2017). It's not just the basal ganglia: Cerebellum as a  
858 target for dystonia therapeutics. *Mov. Disord. Off. J. Mov. Disord. Soc.*
- 859 Tumer, E.C., and Brainard, M.S. (2007). Performance variability enables adaptive plasticity of  
860 “crystallized” adult birdsong. *Nature* *450*, 1240–1244.
- 861 Vargha-Khadem, F., Gadian, D.G., Copp, A., and Mishkin, M. (2005). FOXP2 and the neuroanatomy of  
862 speech and language. *Nat. Rev. Neurosci.* *6*, 131–138.
- 863 Vates, G.E., Vicario, D.S., and Nottebohm, F. (1997). Reafferent thalamo- “cortical” loops in the song  
864 system of oscine songbirds. *J. Comp. Neurol.* *380*, 275–290.
- 865 Voogd, J., and Glickstein, M. (1998). The anatomy of the cerebellum. *Trends Neurosci.* *21*, 370–375.

- 866 Wickens, J.R., Reynolds, J.N.J., and Hyland, B.I. (2003). Neural mechanisms of reward-related motor  
867 learning. *Curr. Opin. Neurobiol.* *13*, 685–690.
- 868 Wickens, J.R., Budd, C.S., Hyland, B.I., and Arbuthnott, G.W. (2007). Striatal contributions to reward  
869 and decision making: making sense of regional variations in a reiterated processing matrix. *Ann. N. Y.*  
870 *Acad. Sci.* *1104*, 192–212.
- 871 Williams, S.M., Nast, A., and Coleman, M.J. (2012). Characterization of synaptically connected nuclei  
872 in a potential sensorimotor feedback pathway in the zebra finch song system. *PLoS One* *7*, e32178.
- 873 Zeier, H., and Karten, H.J. (1971). The archistriatum of the pigeon: organization of afferent and  
874 efferent connections. *Brain Res.* *31*, 313–326.
- 875 Ziegler, W., and Ackermann, H. (2017). Subcortical Contributions to Motor Speech: Phylogenetic,  
876 Developmental, Clinical. *Trends Neurosci.* *40*, 458–468.
- 877
